# Supplementary material
Source: PubMed Central journal article supplement (PMC4240272)
Supplement: NIHMS641637-supplement-Schemas.pdf [file NIHMS641637-supplement-Schemas.pdf]

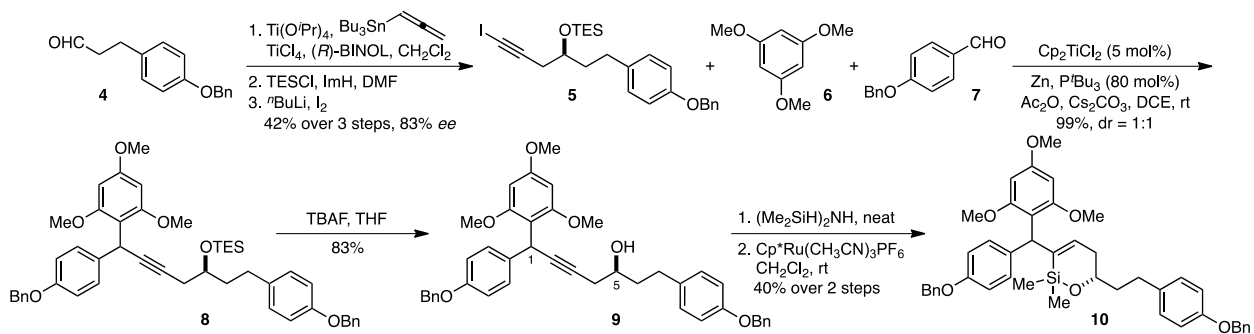

**Scheme 1.** Synthesis of the C2-arylated curcumin derivatives.

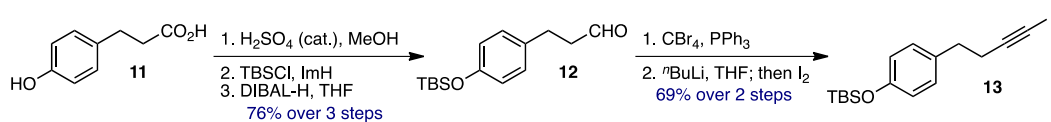

**Scheme 2.** Synthesis of iodoalkyne 13.

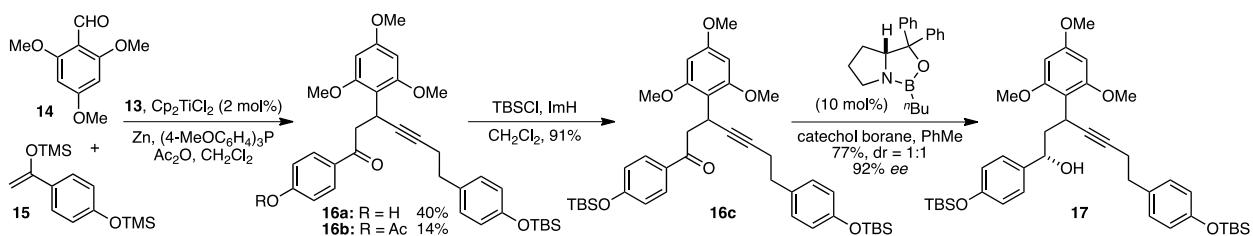

**Scheme 3.** Synthesis of C3-arylated curcumin analogs.
