# Supplementary material
Source: PubMed Central journal article supplement (PMC4240272)
Supplement: NIHMS641637-supplement-Supporting_Material.pdf [file NIHMS641637-supplement-Supporting_Material.pdf]

## SUPPORTING INFORMATION

FOR

# Design, Synthesis, and Evaluation of Curcumin-Derived Arylheptanoids for Glioblastoma and Neuroblastoma Cytotoxicity

Catherine A. Campos,<sup>†</sup> Joseph B. Gianino,<sup>†</sup> Barbara J. Bailey,<sup>‡</sup> Mary E. Baluyut,<sup>‡</sup> Constanze Wiek,<sup>§</sup> Helmut Hanenberg,<sup>§,¶,||,⊥</sup> Harlan Shannon,<sup>‡</sup> Karen E. Pollok<sup>‡\*</sup> and Brandon L. Ashfeld<sup>†\*</sup>

<sup>†</sup>*Department of Chemistry and Biochemistry, Harper Cancer Research Institute, University of Notre Dame, Notre Dame, Indiana 46556*

<sup>‡</sup>*Herman B Wells Center for Pediatric Research, Departments of Pediatrics, Pharmacology and Toxicology, Indiana University School of Medicine, Indianapolis, IN. 46202*

<sup>§</sup>*Department of Otorhinolaryngology (ENT), Heinrich Heine University School of Medicine, Düsseldorf, Germany*

<sup>¶</sup>*Indiana University Simon Cancer Center, Indiana University School of Medicine (IUSM)*

<sup>||</sup>*Department of Pediatrics, Herman B Wells Center for Pediatric Research, Indiana University School of Medicine, Indianapolis, IN 46202, USA*

<sup>⊥</sup>*Department of Medical and Molecular Genetics, Indiana University School of Medicine, Indianapolis, IN 46202, USA*

[kopek@iupui.edu](mailto:kopek@iupui.edu) and [bashfeld@nd.edu](mailto:bashfeld@nd.edu)

## Contents

|                                                   |         |
|---------------------------------------------------|---------|
| 1. General                                        | S2      |
| 2. Synthetic Procedures                           | S3-S9   |
| 3. Biological Evaluation                          | S10     |
| 4. <sup>1</sup> H and <sup>13</sup> C NMR Spectra | S11-S30 |
| 5. References                                     | S31     |

## 1. GENERAL

Solvents and reagents were ACS reagent grade and used without further purification unless noted below. Dimethylformamide (DMF), tetrahydrofuran (THF), dichloromethane (CH<sub>2</sub>Cl<sub>2</sub>) and diethyl ether (Et<sub>2</sub>O) were passed through a column of molecular sieves and stored under argon. 1,2-Dichloroethane (DCE) was distilled, stored over 4 Å molecular sieves, and degassed prior to use. Acetic anhydride (Ac<sub>2</sub>O) was distilled over CaH and zinc dust was washed sequentially with 1.0 M aq. HCl, water, and Et<sub>2</sub>O prior to use.<sup>1</sup> All reactions were carried out in flame-dried glassware under an argon atmosphere unless otherwise specified. Curcumin was purchased as a mixture of curcumin, demethoxycurcumin and bisdemethoxycurcumin, and isolated via flash column chromatography eluting with hexanes/EtOAc (1:1). Compounds **11** and **6** were purchased and used without purification.

<sup>1</sup>H Nuclear magnetic resonance (NMR) spectra were obtained at either 300 or 500 MHz, and <sup>13</sup>C NMR spectra at 100, 125 or 150 MHz. Chemical shifts are reported in parts per million (ppm, δ), and referenced to residual solvent or tetramethylsilane (TMS). Coupling constants are reported in Hertz (Hz). Spectral splitting patterns are designated as s, singlet; d, doublet; t, triplet; q, quartet; p, pentet; m, multiplet; comp, complex; app, apparent; hom, higher order multiplet; and br, broad. Infrared (IR) spectra were obtained using a Thermo Electron Nicolet 380 FT-IR using a silicon (Si) crystal in an attenuated total reflectance (ATR) tower and reported as wavenumbers (cm<sup>-1</sup>). High and Low resolution electrospray ionization (ESI) measurements were made with a Bruker MicroTOF II mass spectrometer. Analytical thin layer chromatography (TLC) was performed using EMD 250 micron 60 F<sub>254</sub> silica gel plates, visualized with UV light and stained with a *p*-anisaldehyde solution. Flash column chromatography was performed according to Still's procedure (Still, W. C.; Kahn, M.; Mitra, A. *J. Org. Chem.* **1978**, *43*, 2923) using EMD 40-63 μm 60Å silica gel.

## 2. SYNTHETIC PROCEDURES

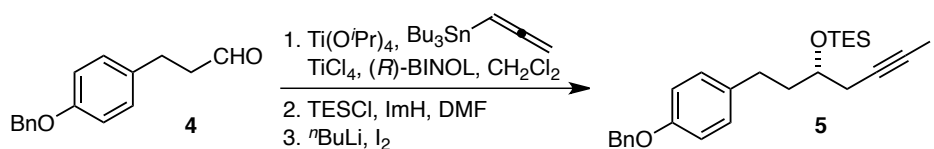

**(S)-((1-(4-(Benzyloxy)phenyl)-6-iodohex-5-yn-3-yl)oxy)triethylsilane (5).** To a solution of  $\text{TiCl}_4$  (0.24 g, 1.27 mmol, 0.14 mL) in  $\text{CH}_2\text{Cl}_2$  (25.0 mL) was added  $\text{Ti}(\text{O}i\text{Pr})_4$  (1.06 g, 3.81 mmol, 1.10 mL) dropwise at  $0\text{ }^\circ\text{C}$  and stirred for 1 h.  $\text{Ag}_2\text{O}$  (589 mg, 2.54 mmol) was then added in one portion and the reaction vessel wrapped in aluminum foil to exclude ambient light. The resulting mixture was stirred for 5 h then (*R*)-BINOL (1.40 g, 5.08 mmol) was added portionwise, the reaction warmed to room temperature by removal of the ice water cooling bath, and stirring continued for 2 h. The reaction was cooled to  $-20\text{ }^\circ\text{C}$ , then aldehyde **4** (3.06 g, 12.73 mmol) and allenyltributyltin(IV) (12.60 g, 38.2 mmol) were added sequentially. After continued stirring for 24 h at  $-20\text{ }^\circ\text{C}$ , saturated aqueous  $\text{NaHCO}_3$  (25.0 mL) was added, and the resulting mixture was allowed to warm to room temperature by removal of the cooling bath. The biphasic mixture was filtered through celite eluting with  $\text{Et}_2\text{O}$  (100 mL), and the layers separated. The aqueous phase was extracted with  $\text{Et}_2\text{O}$  (3 x 15 mL), and the combined organic extracts were dried ( $\text{Na}_2\text{SO}_4$ ) and concentrated under reduced pressure. The resulting crude mixture was purified by flash chromatography eluting with hexanes/ $\text{EtOAc}$  (3:1) to provide 3.1 g (85%, 83% *ee*) of the target alcohol as a colorless oil. Enantiometric excess was determined by HPLC analysis using a Chiral-Dex OD column (96:4 hexanes/ $i\text{PrOH}$ )  $t_r = 26.48$  min;  $t_r = 31.15$  min  $^1\text{H}$  NMR (500 MHz,  $\text{CDCl}_3$ )  $\delta$  7.48-7.46 (m, 2 H), 7.43-7.40 (m, 2 H), 7.37-7.34 (m, 1 H), 7.18-7.15 (m, 2 H), 6.96-6.94 (m, 2 H), 5.07 (s, 2 H), 3.82-3.79 (m, 1 H), 2.81-2.76 (m, 1 H), 2.71-2.65 (m, 1 H), 2.49-2.35 (m, 2 H), 2.11-2.10 (m, 1 H) 1.89-1.85 (m, 2 H);  $^{13}\text{C}$  NMR (125 MHz)  $\delta$  157.2, 137.3, 134.1, 129.5, 128.7, 128.1, 127.6, 115.0, 80.9, 71.2, 70.2, 69.2, 38.1, 31.1, 27.6; IR (neat) 3285, 3030, 2926, 2247, 1610, 1510, 1237;  $[\alpha]_D = -11.10^\circ$  ( $c = 1.0$ ,  $\text{CHCl}_3$ ); HRMS (ESI)  $m/z$  281.1524 [ $\text{C}_{19}\text{H}_{20}\text{O}_2$  (M+1) requires 281.1536].

Imidazole (2.6 g, 38.19 mmol) and TESCl (4.27 mL, 25.5 mmol) were added sequentially to a solution of the starting alcohol (3.10 g, 10.88 mmol) in DMF (25 mL) at room temperature and stirred for 10 min. The mixture was then diluted with water (20 mL) and  $\text{Et}_2\text{O}$  (50 mL), the layers separated, and the organic phase washed with water (2 x 10 mL). The resulting organic layer was dried ( $\text{Na}_2\text{SO}_4$ ) and concentrated under reduced pressure. The crude mixture was dissolved in THF (20 mL) and cooled to  $-78\text{ }^\circ\text{C}$ .  $n\text{BuLi}$  (1.7 M in hexanes, 7.46 mmol, 4.39 mL) was added dropwise, the mixture stirred for 30 min, then a solution of  $\text{I}_2$  (2.1 g, 8.15 mmol) in THF (5.0 mL) was added. The reaction mixture was allowed to warm to room temperature by removal of the cooling bath, diluted with saturated aqueous  $\text{Na}_2\text{S}_2\text{O}_3$ , and the layers separated. The aqueous phase was extracted with  $\text{Et}_2\text{O}$  (3 x 10 mL) and the combined organic extracts were dried ( $\text{Na}_2\text{SO}_4$ ) and concentrated under reduced pressure. The resulting crude mixture was purified by flash chromatography eluting with hexanes/ $\text{CH}_2\text{Cl}_2$  (1:1) to provide 3.11 g (55%) of **5** as a pale yellow oil.  $^1\text{H}$  NMR (500 MHz,  $\text{CDCl}_3$ )  $\delta$  7.47-7.46 (m, 2 H), 7.43-7.39 (m, 2 H), 7.36-7.33 (m, 1 H), 7.15-7.13 (m, 2 H), 6.95-6.93 (m, 2 H), 5.07 (s, 2 H), 3.91-3.86 (m, 1 H), 2.74-2.56 (m, 4 H), 1.96-1.89 (m, 1 H), 1.86-1.79 (m, 1 H), 1.01 (t,  $J = 8.0$  Hz, 9 H), 0.65 (q,  $J = 7.5$  Hz, 6 H).  $^{13}\text{C}$  NMR (125 MHz)  $\delta$  157.2, 137.4, 134.7, 129.6, 129.4, 128.8, 128.1, 127.7, 115.0, 91.9, 70.8, 70.2, 39.1, 30.8, 29.9, 7.1, 5.2; IR (neat) 3063, 3031, 2952, 2910, 2875, 2247, 1611, 1583, 1510, 1455, 1379, 1239, 1102, 1016, 909; HRMS (ESI)  $m/z$  521.1348 [ $\text{C}_{25}\text{H}_{33}\text{O}_2\text{ISi}$  (M+1) requires 521.1367];  $[\alpha]_D = -11.30^\circ$  ( $c = 1.0$ ,  $\text{CHCl}_3$ ).

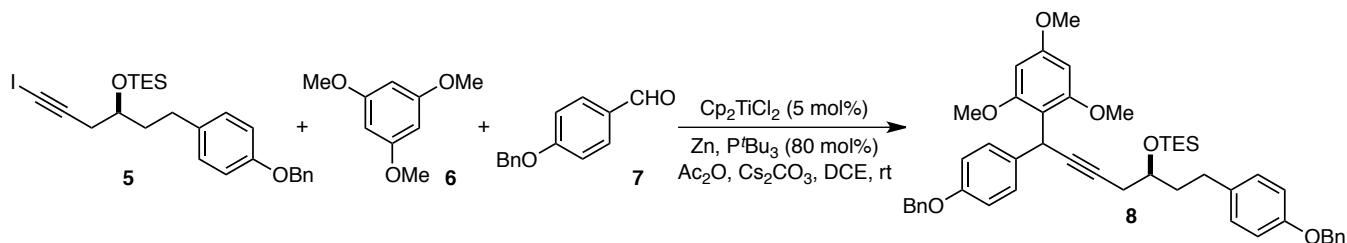

**(((3*S*)-1,7-Bis(4-(benzyloxy)phenyl)-7-(2,4,6-trimethoxyphenyl)hept-5-yn-3-yl)oxy)triethylsilane (8).** A 25 mL round bottom flask, equipped with a magnetic stir bar, was charged with  $\text{Cp}_2\text{TiCl}_2$  (14 mg, 0.059 mmol) and zinc dust (154 mg, 2.36 mmol) then purged with argon for 5 min. Dry, degassed DCE (2.0 mL) was added and the suspension stirred at room temperature until a blue/green color persisted. A solution of  $t\text{Bu}_3\text{P}$  (95 mg, 0.472 mmol) in DCE (1.0 mL) was then added dropwise, and the reaction stirred for an additional 10 min. A solution of **7** (250 mg, 1.18 mmol), **5** (1.23 g, 2.36 mmol), and **6** (397 mg, 2.36 mmol) in DCE (2.0 mL) was then added, and the reaction stirred for 1 h.  $\text{Cs}_2\text{CO}_3$  (384 mg, 1.18 mmol) was added in one portion followed by the slow addition of  $\text{Ac}_2\text{O}$  (0.265 mg, 2.60 mmol, 0.245 mL) in DCE (5.0 mL) over 11 h *via* syringe pump. After the addition was complete, the reaction was diluted with  $\text{CH}_2\text{Cl}_2$  (10 mL), filtered through a plug of silica gel eluting with  $\text{CH}_2\text{Cl}_2$  (250 mL), and the filtrate concentrated under reduced pressure. The crude residue was purified by flash chromatography eluting with hexanes/ $\text{CH}_2\text{Cl}_2$  (3:1  $\rightarrow$  0:1) to provide 893 mg (>99%) of **8** in a 1:1 mixture of diastereomers as a clear, yellow oil.  $^1\text{H}$  NMR (500 MHz,  $\text{CDCl}_3$ ) Isomer A:  $\delta$  7.47-7.32 (m, 12 H), 7.11 (d,  $J = 8.5$  Hz, 2 H), 6.92-6.87 (comp, 4 H), 6.15 (br s, 2 H), 5.65 (br s, 1 H), 5.07 (br s, 2 H), 5.05 (br s, 2 H), 3.97-3.89 (m, 1 H), 3.82 (s, 3 H), 3.72 (s, 6 H), 2.80-2.74 (m, 2 H), 2.55-2.44 (comp, 2 H), 2.12-2.05 (m, 2 H), 1.01 (t,  $J = 8$  Hz, 9 H), 0.66 (q,  $J = 8.0$  Hz, 6 H). Isomer B:  $\delta$  7.47-7.32 (m, 12 H), 7.11 (d,  $J = 8.5$  Hz, 2 H), 6.92-6.87 (comp, 4 H), 6.14 (br s, 2 H), 5.65 (br s, 1 H), 5.07 (br s, 2 H), 5.05 (br s, 2 H), 3.97-3.89 (m, 1 H), 3.82 (s, 3 H), 3.71 (s, 6 H), 2.66-2.60 (m, 2 H), 2.55-2.44 (comp, 2 H), 1.96-1.88 (m, 2 H), 1.01 (t,  $J = 8.0$  Hz, 9 H), 0.65 (q,  $J = 8.0$  Hz, 6 H).  $^{13}\text{C}$  NMR (125 MHz) Isomer A:  $\delta$  160.3, 158.6, 157.0, 157.0, 137.5, 137.4, 135.2, 134.7, 129.5, 128.7, 128.5, 128.4, 128.0, 127.7, 127.1, 126.0, 114.9, 114.2, 114.2, 112.0, 91.6, 82.8, 71.3, 70.2, 56.1, 55.4, 38.7, 38.6, 30.7, 30.3, 28.2, 7.1, 5.2; Isomer B:  $\delta$  160.3, 158.6, 157.0, 157.0, 137.5, 137.4, 135.2, 134.7, 129.5, 128.7, 128.5, 128.4, 128.0, 127.7, 127.1, 126.0, 114.9, 114.2, 114.2, 112.0, 91.5, 82.8, 71.2, 70.2, 56.0, 55.4, 38.7, 38.6, 30.7, 30.2, 28.2, 7.1, 5.2; IR (neat) 3063, 3033, 2954, 2932, 2877, 2859, 1641, 1609, 1512, 1254, 1175; HRMS (ESI)  $m/z$  779.3736 [ $\text{C}_{48}\text{H}_{56}\text{O}_6\text{Si}$  ( $\text{M}+\text{Na}$ ) requires 779.3738].

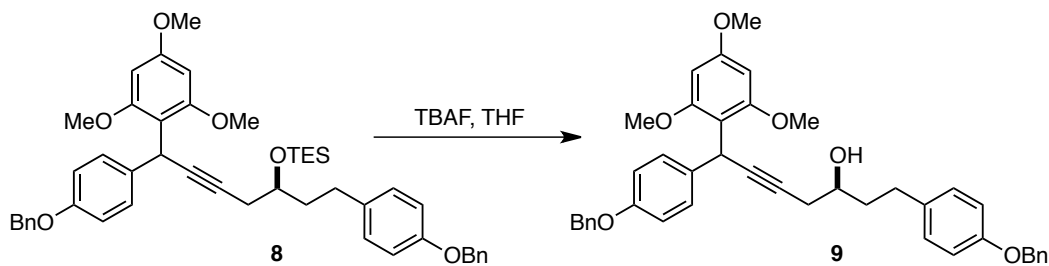

**(3*S*)-1,7-bis(4-(benzyloxy)phenyl)-7-(2,4,6-trimethoxyphenyl)hept-5-yn-3-ol (9).** A solution of  $\text{TBAF}\cdot 3\text{H}_2\text{O}$  (0.08 g, 0.30 mmol) in THF (1.0 mL) was added to a solution of **8** (0.22 g, 0.30 mmol) in THF (1.0 mL) at 0 °C. The resulting solution was stirred for 4 h at room temperature then diluted with a saturated aqueous  $\text{NH}_4\text{Cl}$  (2.0 mL). The layers were separated and aqueous phase extracted with  $\text{Et}_2\text{O}$  (3

x 1.0 mL). The combined organic extracts were dried (MgSO<sub>4</sub>), and concentrated under reduced pressure. The crude residue was purified by flash chromatography eluting with hexanes/EtOAc (2:1) to provide 160 mg (83%) of **9** as a yellow oil. <sup>1</sup>H NMR (500 MHz, CDCl<sub>3</sub>) Isomer A: δ 7.46-7.31 (m, 12 H), 7.15-7.10 (m, 2 H), 6.94-6.90 (m, 2 H), 6.89-6.85 (m, 2 H), 6.16 (s, 2 H), 5.66 (s, 1 H), 5.06 (s, 2 H), 5.04 (s, 2 H), 3.81, (s, 3 H), 3.75 (br s, 8 H), 2.81-2.62 (m, 2 H), 2.56-2.48 (m, 1 H), 2.43-2.33 (s, 1 H), 1.97-1.74 (m, 2 H) Isomer B: δ 7.46-7.31 (m, 12 H), 7.15-7.10 (m, 2 H), 6.94-6.90 (m, 2 H), 6.89-6.85 (m, 2 H), 6.16 (s, 2 H), 5.66 (s, 1 H), 5.06 (s, 2 H), 5.04 (s, 2 H), 3.80, (s, 3 H), 3.75 (br s, 8 H), 2.81-2.62 (m, 2 H), 2.56-2.48 (m, 1 H), 2.43-2.33 (s, 1 H), 1.97-1.74 (m, 2 H); <sup>13</sup>C NMR (125 MHz) Isomer A: δ 160.4, 158.4, 157.2, 137.4, 137.4, 134.6, 134.3, 129.6, 129.6, 128.7, 128.4, 128.1, 127.7, 114.9, 114.9, 114.3, 112.0, 91.8, 85.0, 77.5, 77.2, 77.0, 70.2, 69.5, 66.1, 56.2, 55.5, 38.3, 31.3, 30.1, 28.3 Isomer B: 160.4, 158.4, 157.2, 137.4, 137.4, 134.6, 134.3, 129.6, 129.6, 128.7, 128.4, 128.1, 127.7, 114.9, 114.9, 114.3, 112.0, 91.8, 84.9, 77.5, 77.2, 77.0, 70.2, 69.3, 66.1, 56.2, 55.5, 38.2, 31.3, 30.1, 28.3; IR (neat) 3054, 2960, 2937, 2836, 2303, 1671, 1597, 1489, 1443, 1265; HRMS (ESI) *m/z* 643.3054 [C<sub>42</sub>H<sub>43</sub>O<sub>6</sub> (M+1) requires 643.3025].

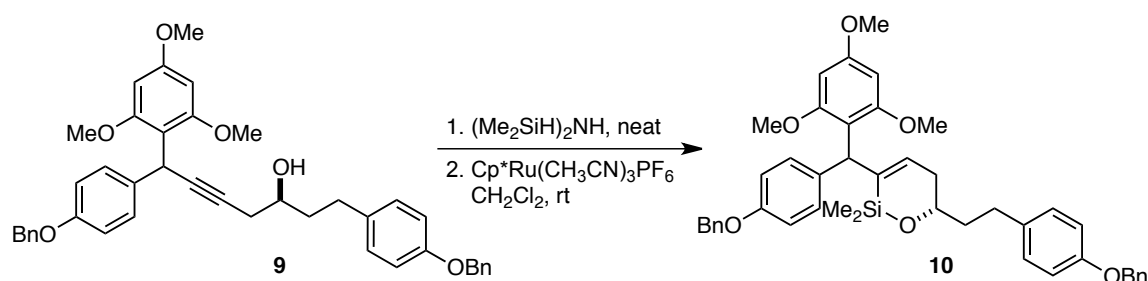

**(6*S*)-6-(4-(benzyloxy)phenethyl)-3-((4-methoxyphenyl)(2,4,6-trimethoxyphenyl)methyl)-2,2-dimethyl-5,6-dihydro-2*H*-1,2-oxasiline (**10**).** A 10 mL round bottom flask was charged with **9** (0.32 g, 0.5 mmol), and tetramethyldisilazane (0.20 g, 1.5 mmol). The neat mixture was heated to 50 °C and stirred for 5 h. The flask was allowed to cool to room temperature by removal of the oil bath then placed under vacuum (~1 mmHg) for 45 min to remove excess tetramethyldisilazane. The flask was purged with Ar, and the residue dissolved in CH<sub>2</sub>Cl<sub>2</sub> (1.0 mL). The resulting solution was cooled to 0 °C, and Cp<sup>\*</sup>Ru(MeCN)<sub>3</sub>PF<sub>6</sub> (0.015 g, 0.03 mmol) was added in one portion. The cooling bath was removed and the reaction stirred for 1 h while warming to room temperature, and the mixture filtered through a short plug of silica eluting with Et<sub>2</sub>O (40 mL). The crude residue was purified by flash chromatography eluting with hexanes/EtOAc (4:1) to provide 150 mg (43%) of **10** as a yellow oil. <sup>1</sup>H NMR (500 MHz, CDCl<sub>3</sub>) Isomer A: δ 7.46-7.31 (m, 10 H), 7.20-7.17 (m, 2 H), 7.12 (d, *J* = 8.5 Hz, 2 H), 6.92-6.90 (m, 2 H), 6.87-6.84 (m, 2 H), 6.12 (s, 2 H), 6.10-6.08 (m, 1 H), 5.30 (s, 1 H), 5.06 (s, 2 H), 5.03 (s, 2 H), 3.85-3.80 (comp, 4 H), 3.68 (s, 6 H), 2.78-2.71 (m, 1 H), 2.66-2.58 (m, 1 H), 2.23-2.07 (m, 2 H), 1.91-1.83 (m, 1 H), 1.73-1.65 (m, 1 H), 0.03 (s, 3 H), -0.13 (s, 3 H) Isomer B: δ 7.46-7.31 (m, 10 H), 7.20-7.17 (m, 2 H), 7.12 (d, *J* = 8.5 Hz, 2 H), 6.92-6.90 (m, 2 H), 6.87-6.84 (m, 2 H), 6.12 (s, 2 H), 6.06-6.04 (m, 1 H), 5.30 (s, 1 H), 5.05 (s, 2 H), 5.03 (s, 2 H), 3.85-3.80 (comp, 4 H), 3.68 (s, 6 H), 2.78-2.71 (m, 1 H), 2.66-2.58 (m, 1 H), 2.23-2.07 (m, 2 H), 1.91-1.83 (m, 1 H), 1.73-1.65 (m, 1 H), 0.06 (s, 3 H), -0.17 (s, 3 H); <sup>13</sup>C NMR (125 MHz) Isomer A: δ 160.5, 159.4, 157.1, 156.9, 141.1, 139.2, 138.5, 137.6, 135.5, 135.0, 130.8, 129.7, 128.8, 128.1, 127.7, 127.7, 114.8, 114.0, 112.6, 91.4, 70.6, 70.3, 70.2, 70.1, 55.7, 55.6, 55.4, 43.7, 39.7, 36.5, 31.1, -0.4, -0.7 Isomer B: δ 160.5, 159.4, 157.1, 156.9, 141.1, 139.2, 138.5, 137.6, 135.5, 135.0, 130.8, 129.7, 128.7, 128.0, 127.7, 127.7, 114.8, 114.0, 112.5, 91.3, 70.6, 70.3, 70.2, 70.1, 55.7, 55.6, 55.4, 43.6, 39.7, 36.4, 31.0, -0.4, -0.5.

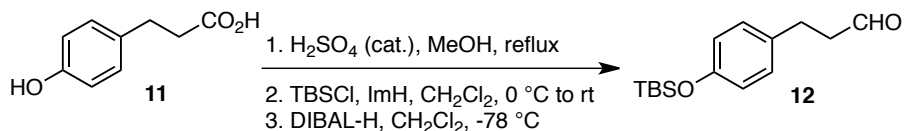

**3-(4-((*tert*-butyldimethylsilyl)oxy)phenyl)propanal (12).**<sup>3</sup> Concentrated H<sub>2</sub>SO<sub>4</sub> (40  $\mu$ l, 0.83 mmol) was added to a solution of 3-(4-hydroxyphenyl)propionic acid (**11**) (2.76 g, 16.6 mmol) in MeOH (30 mL), the resulting solution was heated to reflux and stirred for 10 h. The mixture was cooled to room temperature by removal of the oil bath, and the residual solvent was removed under reduced pressure. The crude residue was dissolved in EtOAc (40 mL), washed with saturated aqueous NaHCO<sub>3</sub> (1 x 40 mL) and the layers were separated. The organic layer was dried (MgSO<sub>4</sub>) and concentrated under reduced pressure to provide a clear, colorless oil that was dissolved in CH<sub>2</sub>Cl<sub>2</sub> (55 mL) and cooled to 0 °C. Imidazole (1.70 g, 24.9 mmol) was added, the solution stirred for 10 min, followed by a portion-wise addition of TBSCl (2.76 g, 18.3 mmol). The cooling bath was removed and the resulting heterogeneous mixture was stirred for 10 h. The mixture was diluted with H<sub>2</sub>O (50 mL), the layers were separated, and the aqueous phase extracted with CH<sub>2</sub>Cl<sub>2</sub> (3 x 50 mL). The combined organic extracts were washed with saturated aqueous NaCl (50 mL), dried (MgSO<sub>4</sub>), and concentrated under reduced pressure to provide 4.39 g of methyl 3-(4-((*tert*-butyldimethylsilyl)oxy)phenyl)propanoate as a clear, colorless crude oil. This crude residue was dissolved in CH<sub>2</sub>Cl<sub>2</sub> (75 mL), cooled to -90 °C, and a solution of DIBAL-H (1.0 M in hexanes, 16.6 mmol, 15 mL) was then added dropwise while ensuring that the internal reaction temperature remained below -80 °C. The mixture was stirred for 1 h, then excess DIBAL-H was quenched by the slow addition of MeOH (15 mL), while again being careful to ensure that the internal temperature of the solution did not rise above -80 °C. The mixture was allowed to warm to room temperature by removal of the cooling bath, diluted with saturated aqueous Rochelle's salt (70 mL), and stirred vigorously for 10 h. The layers were separated and the aqueous phase was extracted with CH<sub>2</sub>Cl<sub>2</sub> (3 x 50 mL). The combined organic extracts were washed with saturated aqueous NaCl (50 mL), dried (MgSO<sub>4</sub>), and concentrated under reduced pressure. The crude residue was purified by flash column chromatography eluting with hexanes/EtOAc (7:1) to provide **12** in 76% yield (16.6 mmol scale, 3.36 mg) over three steps as a clear colorless oil. <sup>1</sup>H and <sup>13</sup>C NMR data for **12** was consistent with literature reported values.<sup>3</sup>

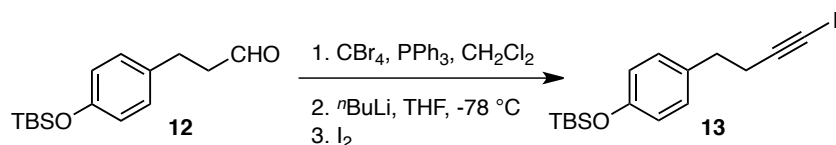

***tert*-Butyl(4-(4-iodobut-3-yn-1-yl)phenoxy)dimethylsilane (13).**<sup>4</sup> A mixture of carbon tetrabromide (11.49 g, 34.8 mmol) and triphenylphosphine (18.27 g, 69.6 mmol) in CH<sub>2</sub>Cl<sub>2</sub> (110 mL) was cooled to 0 °C under a nitrogen atmosphere and stirred for 5 h. A solution of aldehyde **12** (4.60 g, 17.4 mmol) in CH<sub>2</sub>Cl<sub>2</sub> (40 mL) was added dropwise over 30 min, the resulting mixture was allowed to warm to room temperature by removal of the cooling bath and stirred for 10 h. The resulting slurry was filtered and the filter cake was washed with CH<sub>2</sub>Cl<sub>2</sub> (40 mL). The filtrate was washed with H<sub>2</sub>O (2 x 80 mL) and saturated aqueous NaCl (100 mL) then dried (MgSO<sub>4</sub>) and concentrated under reduced pressure. The crude residue was purified by flash column chromatography eluting with hexanes/EtOAc (10:1) to provide the intermediate dibromo alkene in 78% yield (5.71 g, 13.6 mmol) as a clear, pale yellow oil. A

flask equipped with a magnetic stir bar was charged with the dibromo alkene (1.23 g, 2.92 mmol) and THF (24 mL) under an inert atmosphere and cooled to  $-78\text{ }^{\circ}\text{C}$ . A solution of  $n\text{BuLi}$  (2.4 M in hexanes, 4.9 mL, 11.7 mmol) was slowly added dropwise via syringe and the resulting mixture was stirred for 5 h. The reaction was quenched with a solution of iodine (1.12 g, 4.37 mmol) in THF (6 mL), the mixture allowed to warm to room temperature by removal of the cooling bath, and stirred for 3 h. The solution was diluted with  $\text{H}_2\text{O}$  (30 mL) and extracted with  $\text{Et}_2\text{O}$  (3 X 30 mL). The combined organic extracts were washed with saturated aqueous  $\text{Na}_2\text{S}_2\text{O}_3$  (50 mL), dried ( $\text{MgSO}_4$ ), and concentrated under reduced pressure. The crude residue was purified by flash column chromatography eluting with hexanes/ $\text{EtOAc}$  (20:1) to provide 995 mg (88%) of **13** as a clear, pale yellow oil.  $^1\text{H}$  NMR (500 MHz)  $\delta$  7.03-7.06 (m, 2 H), 6.75-6.77 (m, 2 H), 2.76 (t,  $J = 8$  Hz, 2 H), 2.60 (t,  $J = 8$  Hz, 2 H), 0.98 (s, 9 H), 0.18 (s, 6 H);  $^{13}\text{C}$  NMR (125 MHz)  $\delta$  154.3, 133.2, 129.5, 120.2, 94.3, 34.3, 26.3, 25.9, 23.45, 18.4, -4.21; IR (neat)  $\text{cm}^{-1}$  3027, 2928, 2857, 1609, 1509, 1470, 1389, 1361, 1254, 1169, 1100, 1007; mass spectrum (ESI)  $m/z$  387.0671 [ $\text{C}_{16}\text{H}_{24}\text{IOSi}$  requires (M+1) 387.0641].

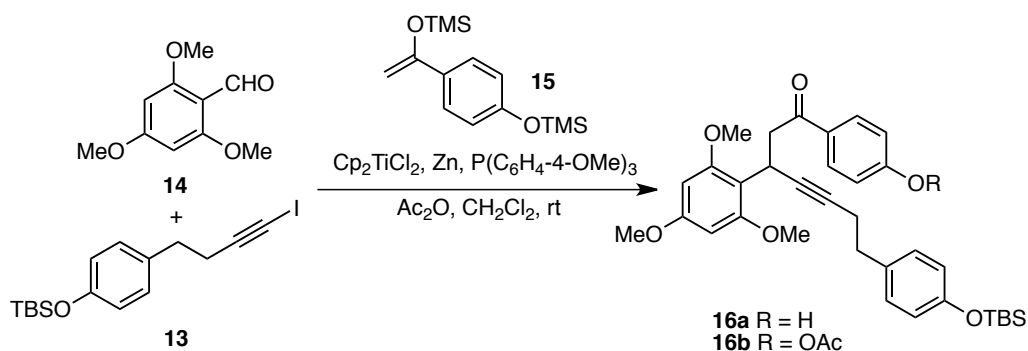

**7-(4-((*tert*-Butyldimethylsilyloxy)phenyl)-1-(4-hydroxyphenyl)-3-(2,4,6-trimethoxyphenyl)hept-4-yn-1-one and 4-(7-(4-((*tert*-butyldimethylsilyloxy)phenyl)-3-(2,4,6-trimethoxyphenyl)hept-4-ynoyl)phenyl acetate (16a and 16b).** A vial equipped with a magnetic stir bar, was charged with  $\text{Cp}_2\text{TiCl}_2$  (5.0 mg, 19.9  $\mu\text{mol}$ ) and zinc dust (0.14 g, 2.09 mmol) then purged with nitrogen for 5 min. Dry, degassed  $\text{CH}_2\text{Cl}_2$  (2 mL) was added and the resulting gray slurry was stirred vigorously at room temperature until it took on a blue/green hue. Tris(4-methoxyphenyl)phosphine (0.14 g, 0.40 mmol) was added in one portion followed by the dropwise addition of a solution of aldehyde **14** (0.20 g, 1.00 mmol) and alkynyl iodide **13** (0.50 g, 1.29 mmol) in  $\text{CH}_2\text{Cl}_2$  (1.0 mL). The resulting mixture was stirred at room temperature for 2 hr, then silyl enol ether **15**<sup>5</sup> (0.36 g, 1.29 mmol) was added in one portion via syringe followed by a solution of  $\text{Ac}_2\text{O}$  (0.10 mL, 1.10 mmol) in  $\text{CH}_2\text{Cl}_2$  (1 mL) over 11 hours via syringe pump. Once the addition of  $\text{Ac}_2\text{O}$  was complete, the resulting crude mixture was allowed to stir at room temperature for 2 hr, then diluted with  $\text{CH}_2\text{Cl}_2$  (2 mL), filtered through a short plug of silica gel eluting with  $\text{Et}_2\text{O}$  (55 mL), and concentrated under reduced pressure. The crude residue was purified by flash column chromatography eluting with hexanes/ $\text{EtOAc}$  (6:1) to provide 226 mg (40%) of **16a** and 83 mg (14%) of **16b** each as a thick, clear, pale yellow oil. **16a**:  $^1\text{H}$  NMR (500 MHz)  $\delta$  7.90-7.92 (m, 2 H), 6.97-6.99 (m, 2 H), 6.82-6.85 (m, 2 H), 6.65-6.68 (m, 2 H), 6.12 (s, 2 H), 5.44 (br s, 1 H), 4.88-4.91 (m, 1 H), 3.80 (s, 6 H), 3.79 (s, 3 H), 3.70 (dd,  $J = 8.5, 16$  Hz, 1 H), 3.23 (dd,  $J = 6, 15.8$  Hz, 1 H), 2.63 (t,  $J = 7.5$  Hz, 2 H), 2.31 (td,  $J = 2, 8$  Hz, 2 H), 0.97 (s, 9 H), 0.16 (s, 6 H);  $^{13}\text{C}$  NMR (125 MHz)  $\delta$  198.4, 160.6, 160.2, 158.9, 153.9, 134.2, 131.1, 130.3, 129.5, 119.9, 115.4, 110.5, 91.5, 82.6, 78.8, 56.1, 55.5, 43.0, 34.9, 25.9, 22.6, 21.6, 18.4, -4.2; IR (neat)  $\text{cm}^{-1}$  3345, 2932, 2856,

1658, 1604, 1509, 1417, 1325, 1259, 1224, 1205, 1167, 1150, 1118; mass spectrum (ESI)  $m/z$  597.2651 [ $C_{34}H_{42}NaO_6Si$  requires (M+Na) 597.2648]. **16b**:  $^1H$  NMR (500 MHz)  $\delta$  7.98-8.01 (m, 2 H), 7.15-7.17 (m, 2 H), 6.98-7.01 (m, 2 H), 6.66-6.68 (m, 2 H), 6.12 (s, 2 H), 4.88-4.91 (m, 1 H), 3.79 (s, 9 H), 3.73 (dd,  $J = 8, 16$  Hz, 1 H), 3.29 (dd,  $J = 6, 16$  Hz, 1 H), 2.64 (t,  $J = 7.5$  Hz, 2 H), 2.30-2.34 (m, 5 H), 0.97 (s, 9 H), 0.16 (s, 6 H);  $^{13}C$  NMR (125 MHz) 197.8, 169.1, 160.2, 158.8, 154.2, 153.9, 135.0, 134.2, 130.1, 129.5, 121.7, 119.9, 91.4, 82.3, 78.7, 56.1, 55.5, 43.3, 34.9, 25.9, 22.3, 21.6, 21.4, 18.4, -4.3; IR (neat)  $cm^{-1}$  2931, 2856, 1762, 1686, 1602, 1509, 1465, 1416, 1258, 1201, 1163, 1118, 1040; mass spectrum (ESI)  $m/z$  639.2758 [ $C_{36}H_{45}NaO_7Si$  requires (M+Na) 639.2754].

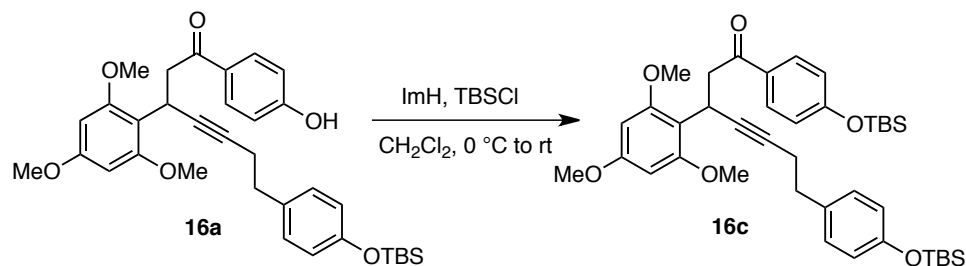

**1,7-Bis(4-((*tert*-butyldimethylsilyl)oxy)phenyl)-3-(2,4,6-trimethoxyphenyl)hept-4-yn-1-one (16c)**. Imidazole (37.0 mg, 0.55 mmol) was added to a solution of **16a** (0.21 g, 0.36 mmol) in  $CH_2Cl_2$  (2 mL) at 0 °C and stirred for 10 min. TBSCl (60.0 mg, 0.40 mmol) was then added portion-wise, the resulting heterogeneous mixture allowed to warm to room temperature by removal of the cooling bath, and stirred for 10 h. The mixture was diluted with  $H_2O$  (5 mL), the layers were separated, and the aqueous phase extracted with  $CH_2Cl_2$  (3 x 5 mL). The combined organic extracts were washed with saturated aqueous NaCl (1 x 5 mL), dried ( $MgSO_4$ ), and concentrated under reduced pressure. The crude residue was purified by flash column chromatography eluting with hexanes/EtOAc (5:1) to provide 229 mg (91%) of **16c** as a thick, clear, colorless oil.  $^1H$  NMR (500 MHz)  $\delta$  7.88-7.91 (m, 2 H), 6.97-7.00 (m, 2 H), 6.83-6.86 (m, 2 H), 6.65-6.68 (m, 2 H), 6.12 (s, 2 H), 4.88-4.92 (m, 1 H), 3.78-3.79 (m, 9 H), 3.71 (dd,  $J = 8, 15.8$  Hz, 1 H), 3.23 (dd,  $J = 6, 15.8$  Hz, 1 H), 2.63 (t,  $J = 7.5$  Hz, 2 H), 2.31 (td,  $J = 2, 8$  Hz, 2 H), 0.99 (s, 9 H), 0.97 (s, 9 H), 0.22 (s, 6 H), 0.16 (s, 6 H);  $^{13}C$  NMR (125 MHz)  $\delta$  197.6, 160.2, 160.1, 158.9, 153.9, 134.2, 131.2, 130.6, 129.5, 119.9, 119.8, 110.7, 91.5, 82.7, 78.6, 56.1, 55.4, 43.0, 35.0, 25.9, 25.8, 22.4, 21.6, 18.4, 18.3, -4.2, -4.3; IR (neat)  $cm^{-1}$  2930, 2857, 2249, 1680, 1597, 1505, 1469, 1415, 1390, 1257, 1165, 1118, 1041, 1061, 1007; mass spectrum (ESI)  $m/z$  689.3671 [ $C_{40}H_{57}NaO_6Si_2$  requires (M+Na) 689.3694].

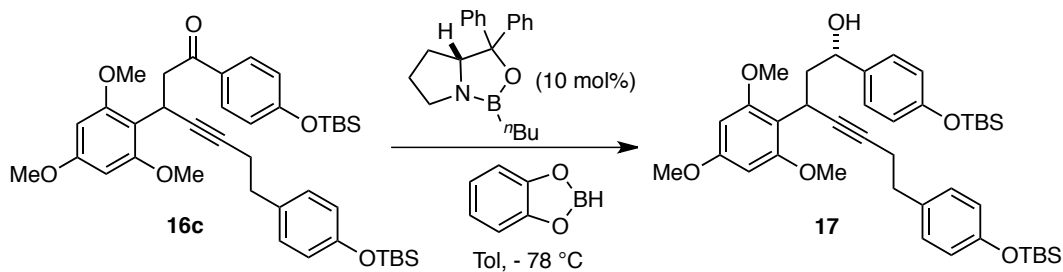

**(1*S*)-1,7-Bis(4-((*tert*-butyldimethylsilyl)oxy)phenyl)-3-(2,4,6-trimethoxyphenyl)hept-4-yn-1-ol (17)**.<sup>6</sup> To a solution of **16c** (42.6 mg, 61.8  $\mu$ mol) in toluene (0.48 mL) was added a solution of (*S*)-(-)-2-Butyl-CBS-oxazaborolidine catalyst<sup>7</sup> (0.21 M in toluene, 30  $\mu$ L, 6.18  $\mu$ mol), and the resulting mixture stirred for 30 min at room temperature. The solution was then cooled to -78 °C followed by the addition



of catechol borane (4.7 M in toluene, 0.17 mL, 0.80 mmol) dropwise via syringe over 5 min. The reaction was stirred for an additional 2.5 h then diluted with MeOH (5 mL) while maintaining the bath temperature at  $-78\text{ }^{\circ}\text{C}$ . The reaction was allowed to warm to room temperature by removal of the cooling bath, then diluted with Et<sub>2</sub>O (5 mL), and washed with 1M NaOH/saturated aqueous NaHCO<sub>3</sub> (2:1). The combined organic extracts were dried (MgSO<sub>4</sub>) and concentrated under reduced pressure. The crude residue was purified by flash column chromatography eluting with hexanes/EtOAc (5:1) to provide 30.1 mg (77%) of **17** as a sticky white foam in a 1:1 mixture of diastereomers. The enantiomeric excess of each diastereomer (92% *ee*) was determined by HPLC analysis using a Chiral-Dex AD column (98:2 hexanes/*i*PrOH, flow rate = 0.3 mL/min)  $t_{\text{r}}(\text{isomer A}_{\text{major}}) = 49.2\text{ min}$ ;  $t_{\text{r}}(\text{isomer A}_{\text{minor}}) = 68.2\text{ min}$ ;  $t_{\text{r}}(\text{isomer B}_{\text{major}}) = 61.2\text{ min}$ ;  $t_{\text{r}}(\text{isomer B}_{\text{minor}}) = 51.7\text{ min}$ . <sup>1</sup>H NMR (500 MHz)  $\delta$  7.15-7.20 (m, 4 H), 7.03-7.08 (m, 4 H), 6.70-7.79 (comp, 8 H), 6.15 (s, 2 H), 6.12 (s, 2 H), 4.79-4.81 (m, 1 H), 4.43-4.48 (comp, 2 H), 4.33-4.36 (m, 1 H), 3.81 (s, 3 H), 3.80 (s, 3 H), 3.79 (s, 6 H), 3.77 (s, 6 H), 2.89 (br d,  $J = 2.5\text{ Hz}$ , 1 H), 2.73 (m, 4 H), 2.26-2.44 (comp, 6 H), 2.12-2.17 (m, 2 H), 1.96 (ddd,  $J = 5, 9, 14\text{ Hz}$ , 1 H), 0.97 (br s, 36 H), 0.17-0.18 (m, 24 H); <sup>13</sup>C NMR (125 MHz)  $\delta$  160.3, 160.2, 160.1, 155.0, 154.9, 154.1, 137.8, 137.1, 134.2, 134.1, 129.6, 129.5, 127.4, 127.2, 119.9, 119.8, 110.8, 109.9, 91.4, 83.1, 82.7, 79.2, 78.9, 72.6, 56.1, 56.0, 55.5, 55.4, 43.7, 43.1, 35.1, 25.9, 23.7, 23.2, 21.6, 21.2, 18.4, -4.3; IR (neat)  $\text{cm}^{-1}$  3550, 2930, 2857, 1607, 1511, 1469, 1417, 1390, 1361, 1329, 1259, 1222, 1204, 1151, 1119, 1060; mass spectrum (ESI)  $m/z$  713.3663 [C<sub>40</sub>H<sub>58</sub>NaO<sub>6</sub>Si<sub>2</sub> requires (M+Na) 713.3670].

### 3. BIOLOGICAL EVALUATION

**Cell lines.** The U87-MG cells were purchased from the American Type Culture Collection (ATCC) and maintained in Iscove's Modified Dulbecco's medium and 10% fetal bovine serum (FBS). The SK-N-SH cells (ATCC) and the SK-N-F1 cells (Sigma-Aldrich) were maintained in RPMI-1640 and 10% FBS.

**Knockdown of human p53 in U87-MG cells.** Vesicular Stomatitis Viral envelope-pseudotyped lentiviral supernatants were generated for pCLIPw.shp53 and pCLIPw.shEGFP transfer vectors<sup>8</sup> and stably transduced cells selected in puromycin. Western blot analysis indicated that p53 expression was knocked down by >95% in pCLIPw.shp53-transduced U87-MG cells following selection in puromycin (data not shown).

**Methylene blue assay.** Cells were exposed continuously to increasing concentrations of select intermediate compounds and cell growth determined at day 5 using a methylene blue staining assay that measures cell mass and correlates with cell growth.<sup>9</sup>

**Colony-forming unit (CFU) assay.** Compound effect on growth of hematopoietic progenitor colonies was determined by CFU assays as previously described.<sup>10</sup> Human CD34+ cells were isolated from umbilical cord, suspended in Methocult GF H4434 (Stem Cell Technologies, Inc.) and exposed to compound. The cells were immediately seeded in triplicate at concentrations of  $2 \times 10^3$ . After 10 - 14 days of incubation at 37°C in 5% CO<sub>2</sub>, colony forming units-granulocyte-macrophage (CFU-GM) and burst-forming units-erythroid (BFU-E) and colony forming unit-granulocyte/erythrocyte/monocyte/megakaryocyte (CFU-GEMM) were enumerated using the Axiovert 25 inverted-light microscope.

**Statistical Analysis.** The mean and standard deviation were determined for each experimental group. Concentration-response curves were analyzed by one-way ANOVA using SigmaPlot v11.0 (Systat Software, Inc.) followed by a Dunnett's test comparing each data point to media control values. Experiments using U87, SK-N-SH and SK-N-FI were repeated twice with similar results. The shRNA knockdown experiments using U87 MG cells were performed once.

#### 4. $^1\text{H}$ AND $^{13}\text{C}$ NMR SPECTRA

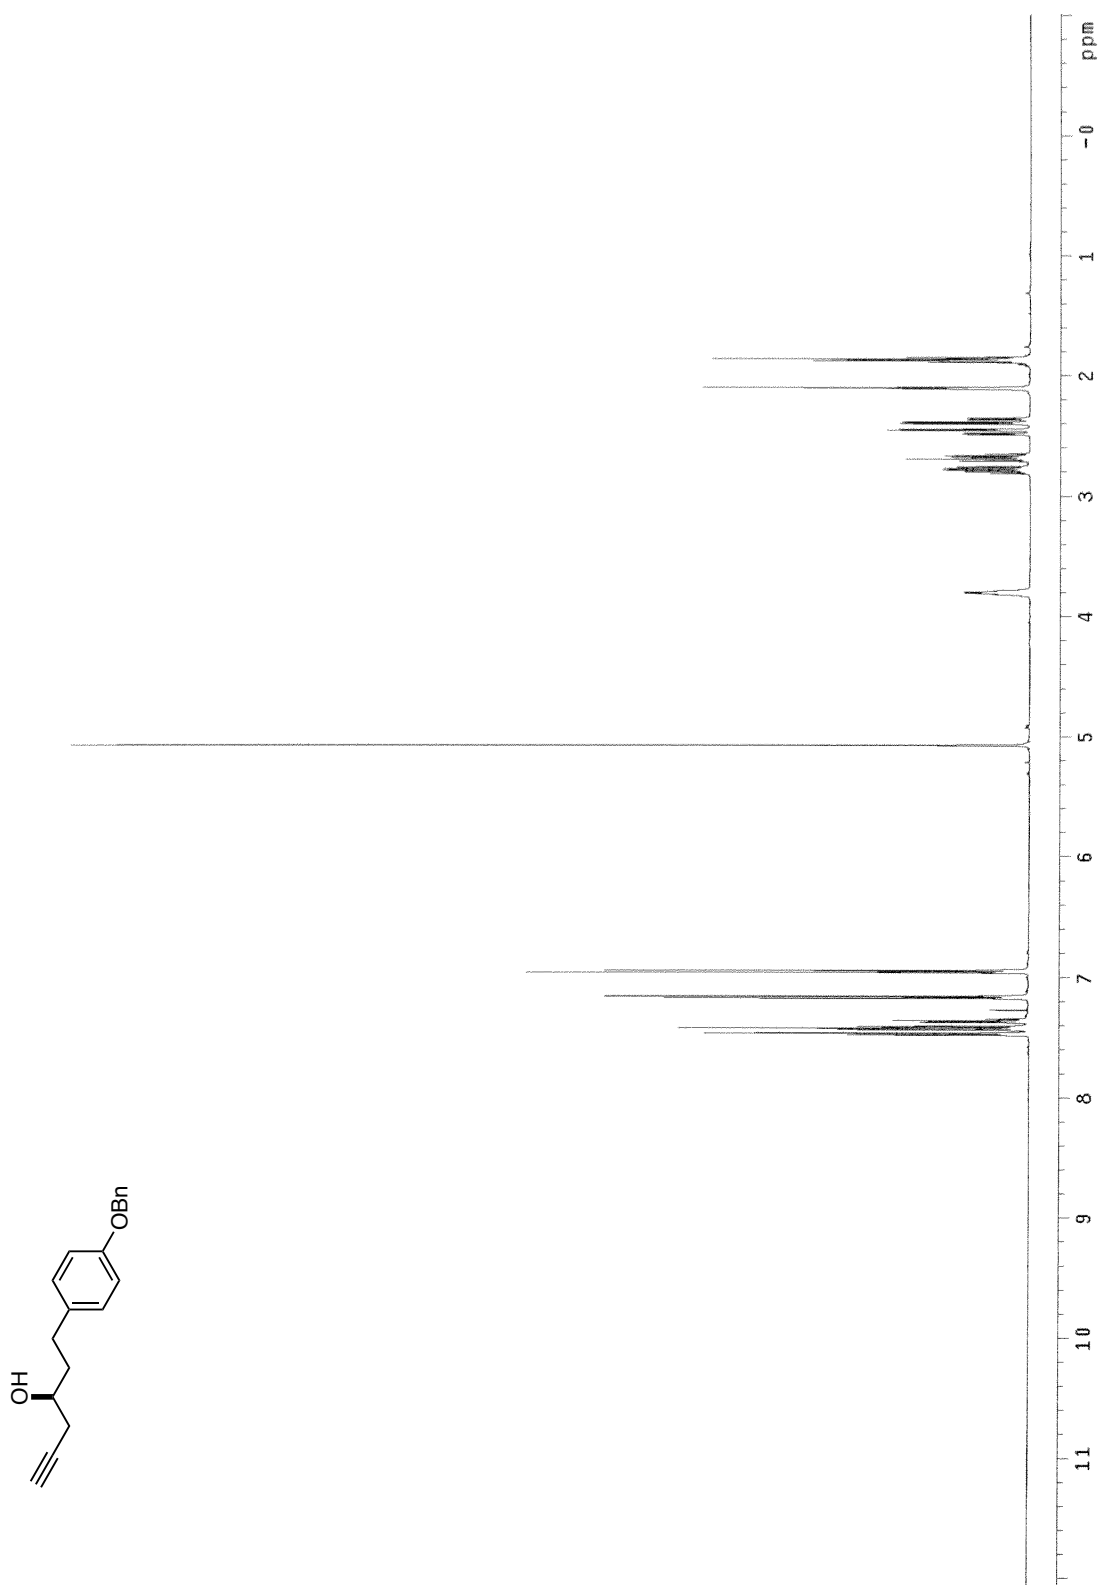

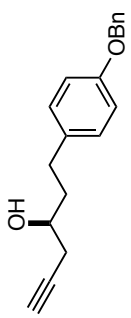

STANDARD PROTON PARAMETERS  
 Pulse Sequence: s2pu1  
 Solvent: CDC13  
 Ambient temperature  
 User: i-14-87  
 File: J065IV211-C  
 INOVA-500 "D:\och.chem.nd.edu"

Relax. delay 1.800 sec  
 Pulse 90.0 degrees  
 Acq. time 1.215 sec  
 Width 26963.3 Hz  
 OBSERVED F1 500.13601782 MHz  
 DECOUPLE F1 439.8636613 MHz  
 Power 40 dB,  
 continuously on  
 WALTZ-16 modulated  
 DATA PROCESSING  
 Line broadening 1.0 Hz  
 FT size 131072  
 Total time 13 min, 6 sec

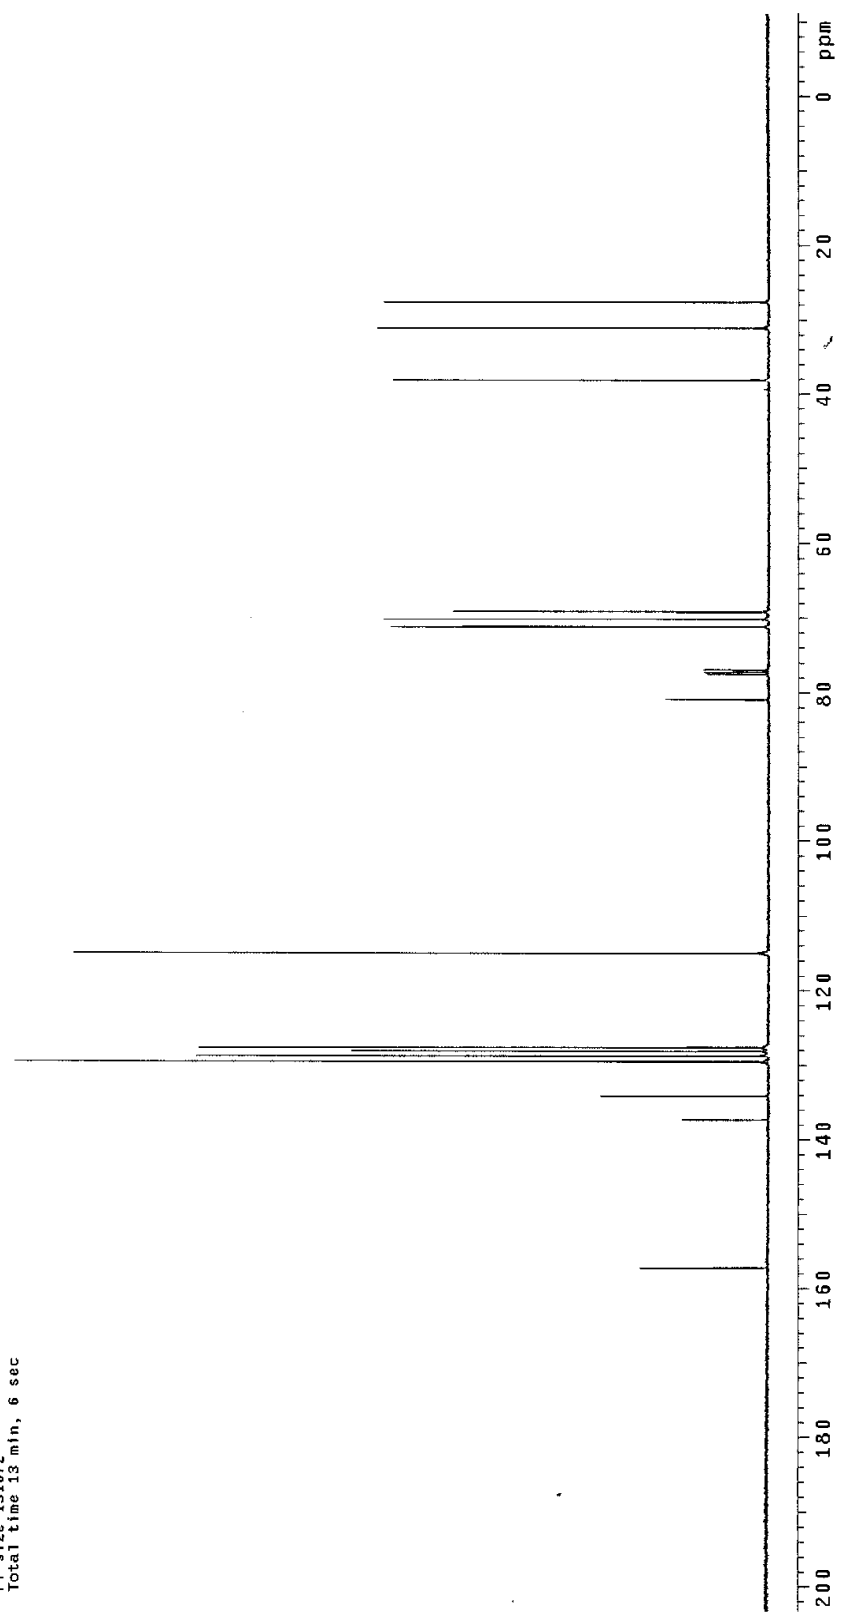

STANDARD PROTON PARAMETERS

Pulse Sequence: s2pu1  
Solvent: CDCl3  
Ambient temperature  
INOVA-500 "nmr2a.Chem.nd.edu"  
Relax. delay 0.100 sec  
Pulse 90.0 degrees  
Acq. time 5.016 sec  
Width 6533.3 Hz  
8 repetitions  
OBSERVE H1, 499.8611715 MHz  
DATA PROCESSING  
F1 size 65536  
Total time 0 min, 40 sec

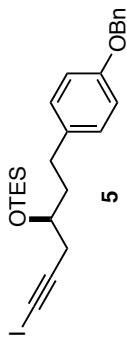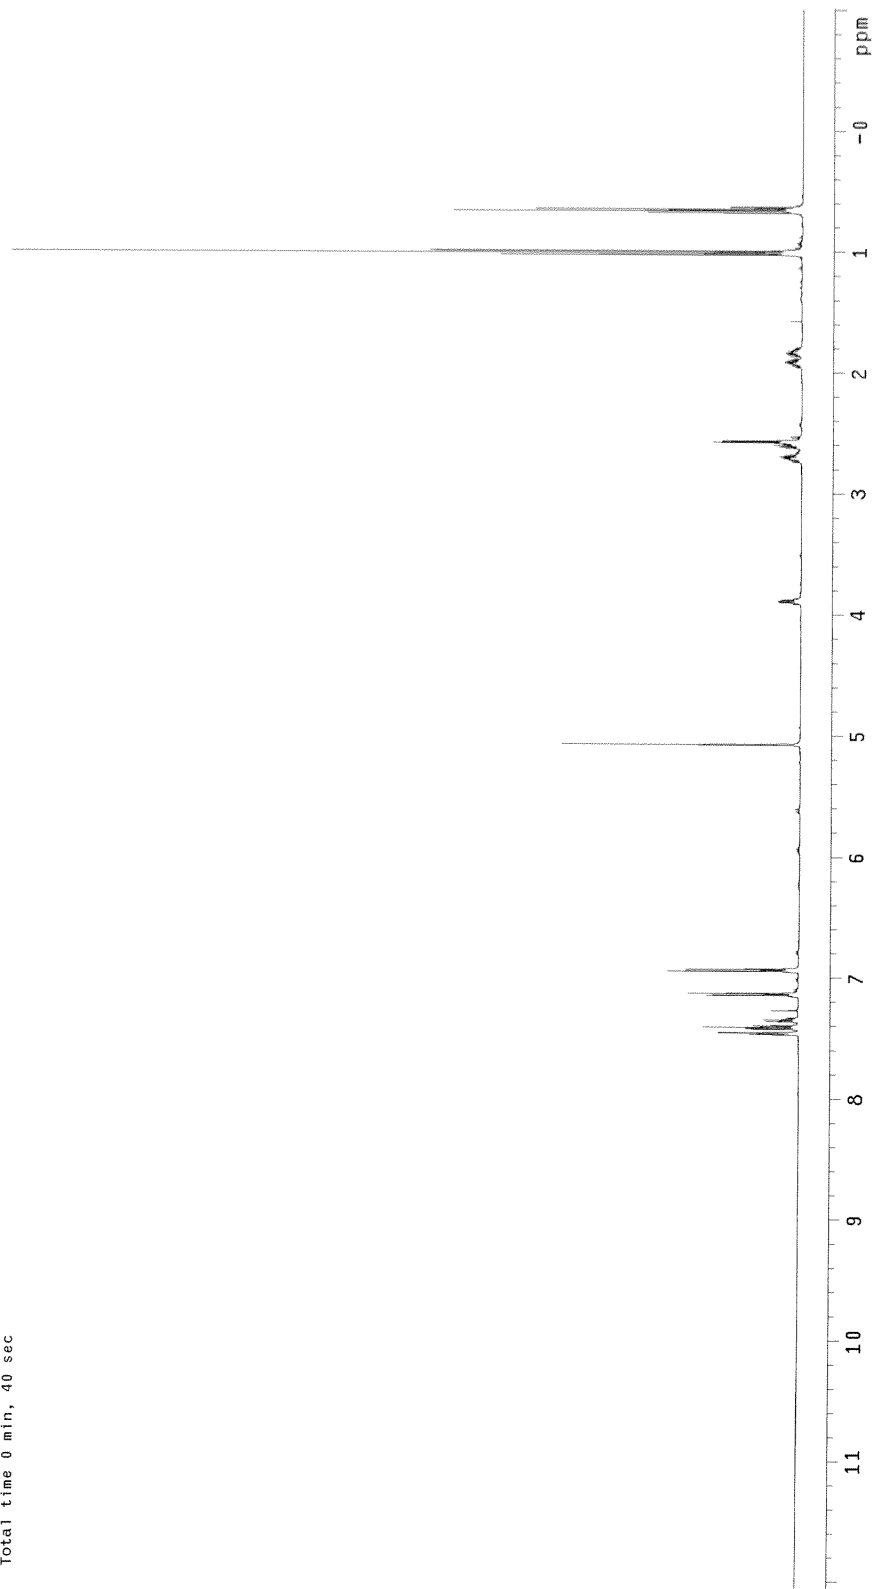

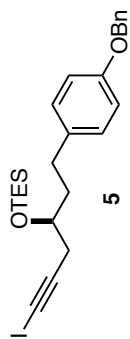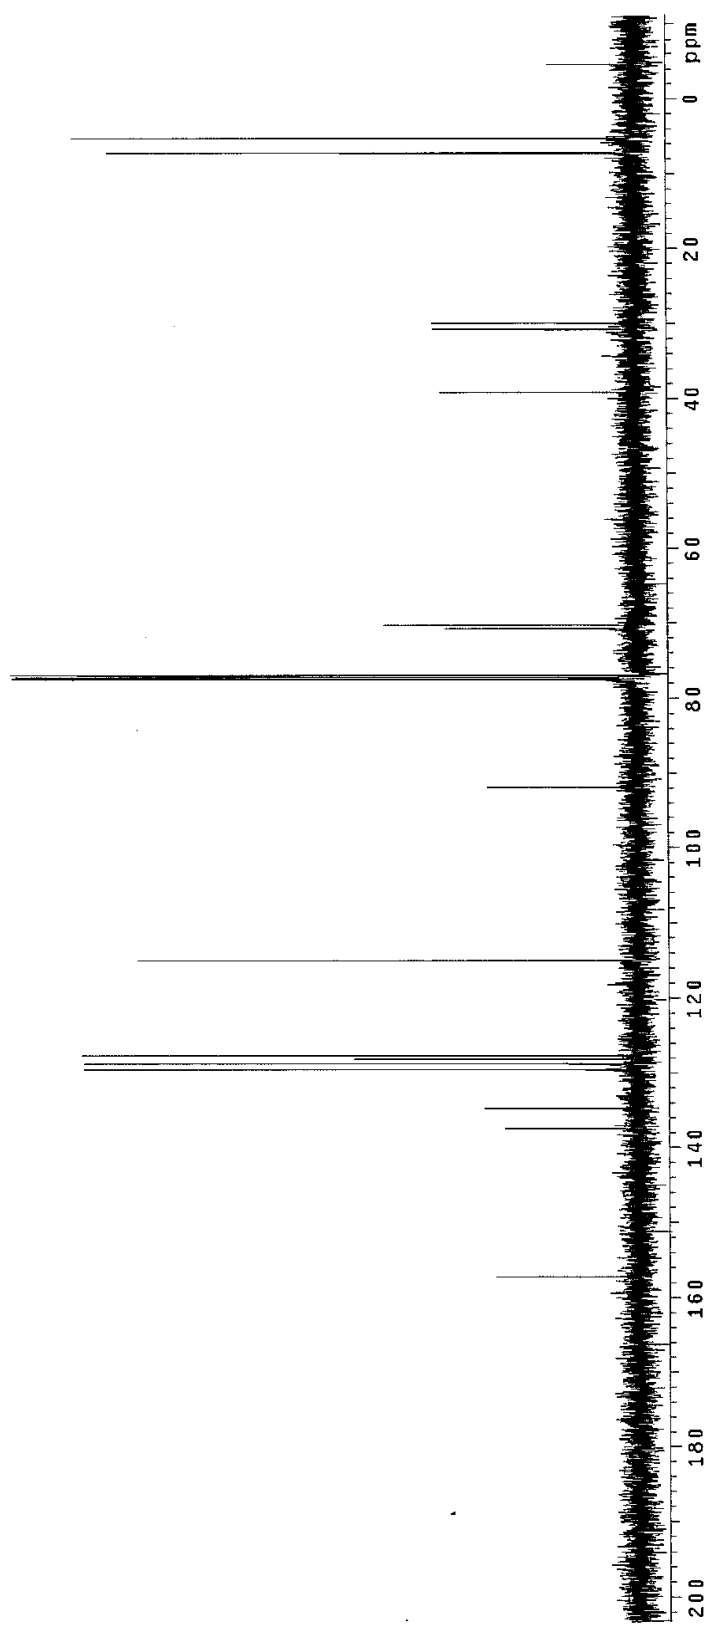

STANDARD PROTON PARAMETERS  
Pulse Sequence: s2pul  
Solvent: CDCl3  
Ambient temperature  
INOVA-500 "nmr2a.chem.nd.edu"  
Relax. delay 0.100 sec  
Pulse 90.0 degrees  
Acq. time 5.016 sec  
Width 6533.3 Hz  
8 repetitions  
OBSERVE HI, 499.8611711 MHz  
DATA PROCESSING  
FI size 65536  
Total time 0 min, 40 sec

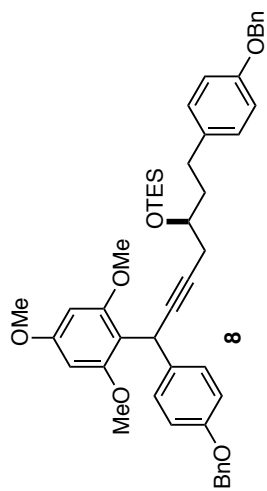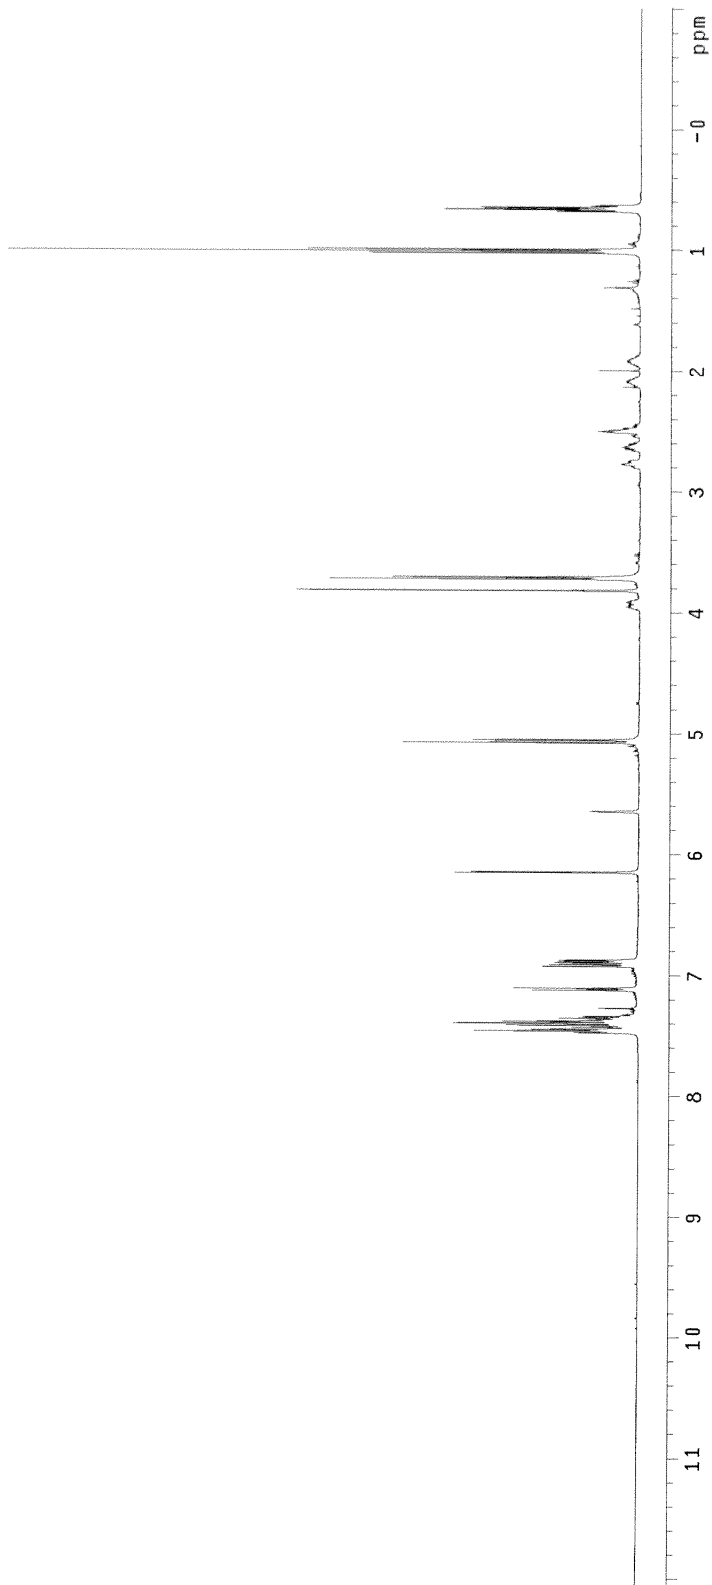

STANDARD PROTON PARAMETERS

Pulse Sequence: s2pu1  
Solvent: CDCl3  
Ambient temperature  
User: 1-14-87  
INOVA-500 "nmrza.chem.nd.edu"  
Relax. delay 1.800 sec  
Pulse 90.0 degrees  
Acq. time 1.215 sec  
Width 26963.3 Hz  
200 repetitions  
OBSERVE C13, 125.6901722 MHz  
DECOUPLE H1, 499.8636613 MHz  
Power 40 dB  
continuously on  
WALTZ16 accumulated  
DATA PROCESSING  
Time offsetting 1.0 Hz  
FT size 131072  
Total time 10 min, 4 sec

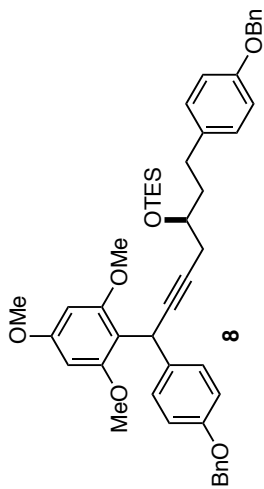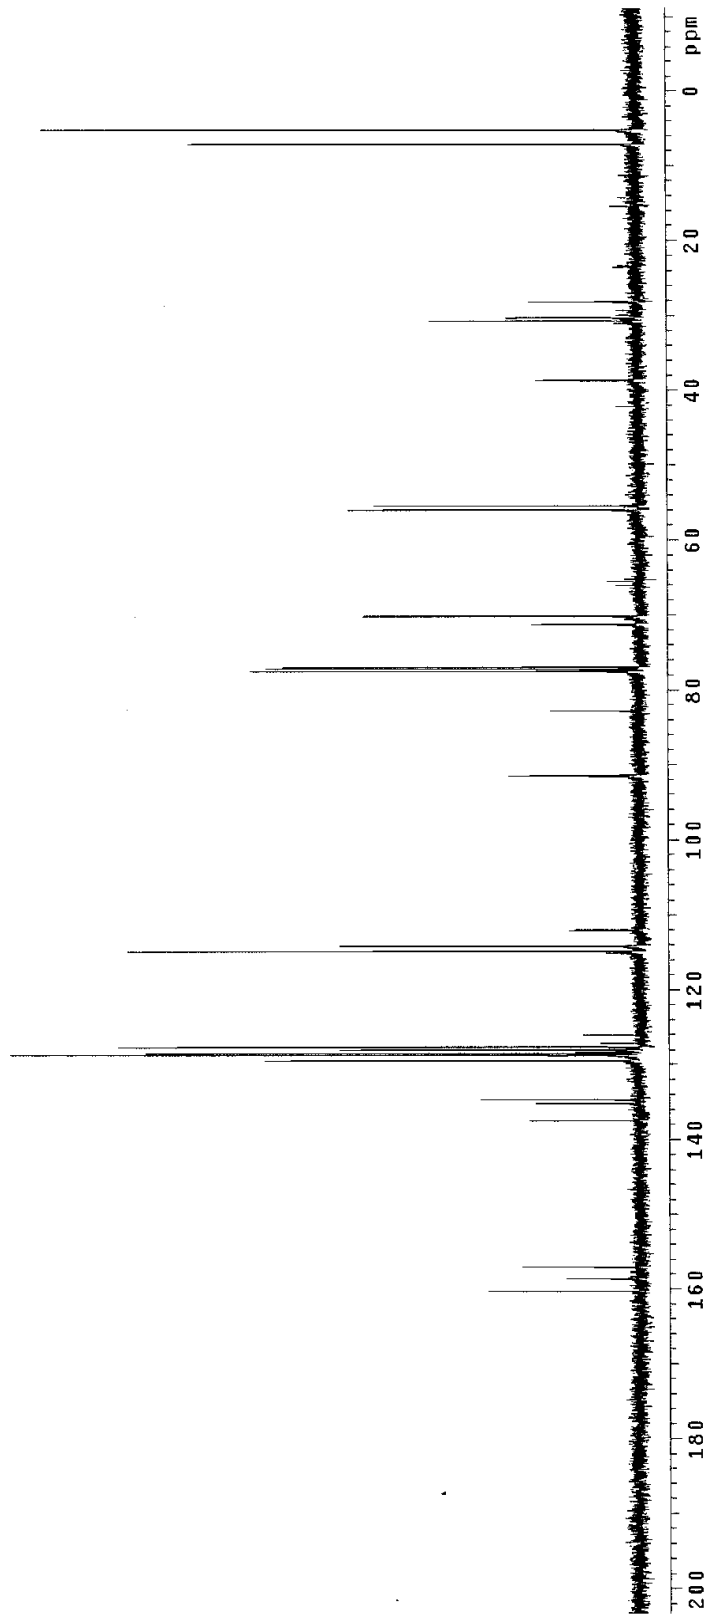



STANDARD PROTON PARAMETERS

Pulse Sequence: s2pu1  
Solvent: CDCl3  
Ambient temperature  
INDVA-500 <sup>1</sup>Hmrza.chem.nd.edu"

Relax. delay 0.100 sec  
Pulse: 90.0 degrees  
Acq. time 5.016 sec  
Width 6533.3 Hz  
8 repetitions  
OBSERVE HI: 499.8611713 MHz  
DATA PROCESSING  
FT size 65536  
Total time 0 min, 40 sec

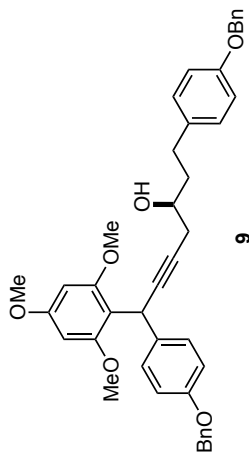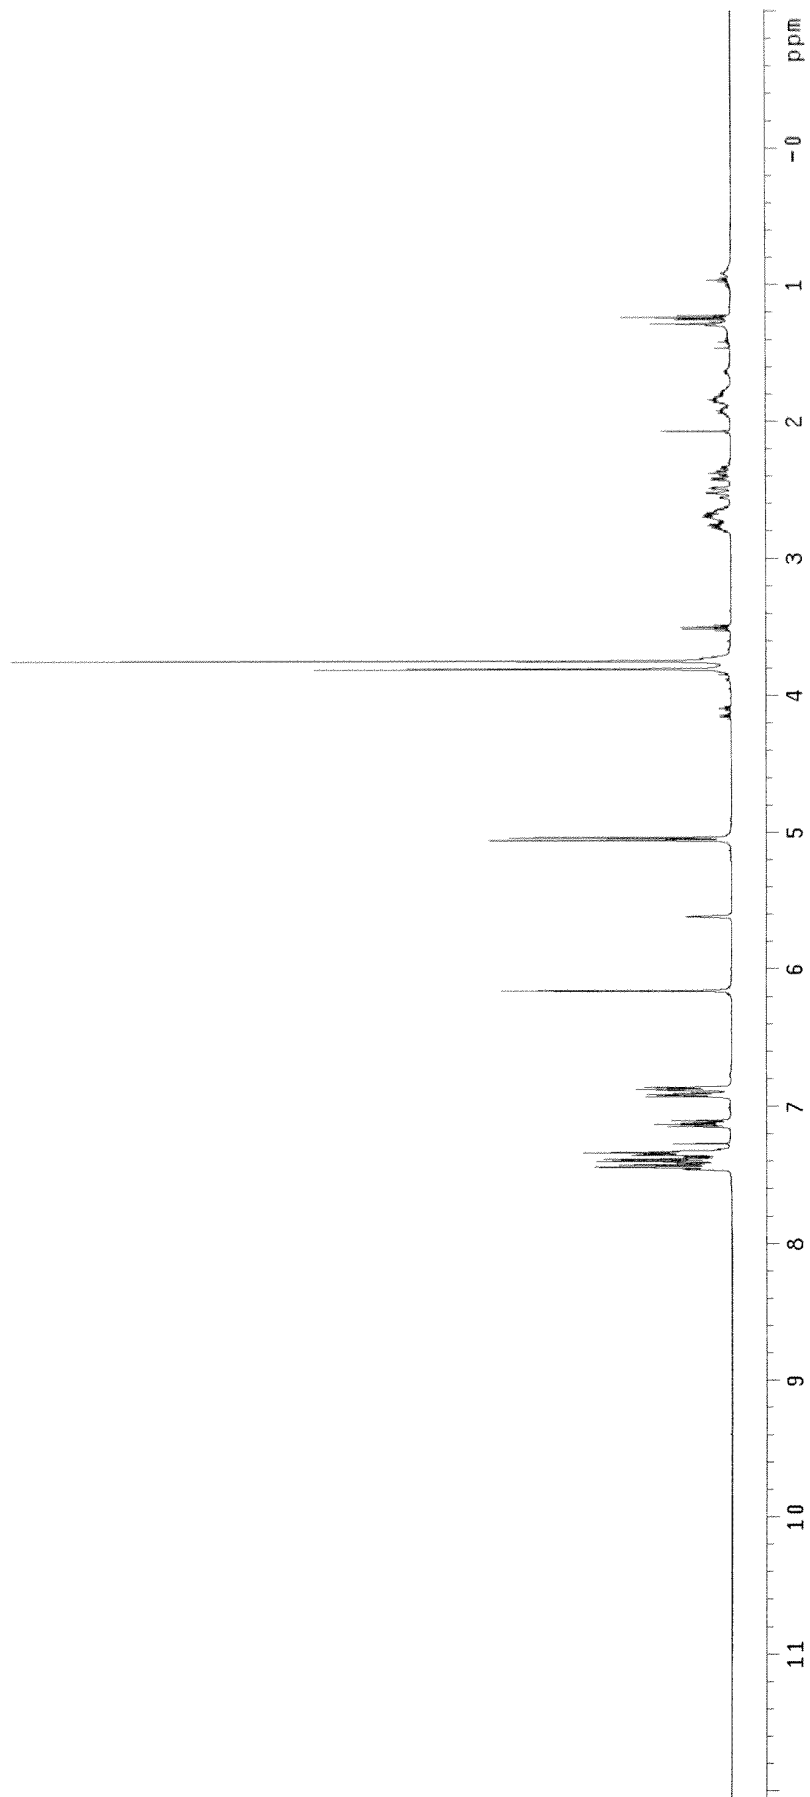

STANDARD PROTON PARAMETERS

Pulse Sequence: s2pul  
Solvent: CDCl3  
Ambient temperature  
User: 1-14-87  
File: JBGVUBP-C  
INOVA-500 "b1och.chem.nd.edu"

Relax. delay 1.800 sec  
Pulse 90.0 degrees  
Acq. time 1.215 sec  
Width 26963.3 Hz  
400 repetitions  
OBSERVE C13, 125.6901702 MHZ  
DECUPLE H1, 499.8636613 MHZ  
Power 40 dB  
continuously on  
WALTZ-16 modulated  
DATA PROCESSING  
Line broadening 1.0 Hz  
FT size 131072  
Total time 20 min, 10 sec

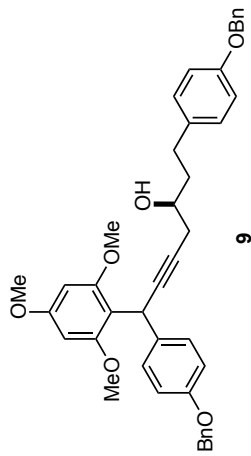

9

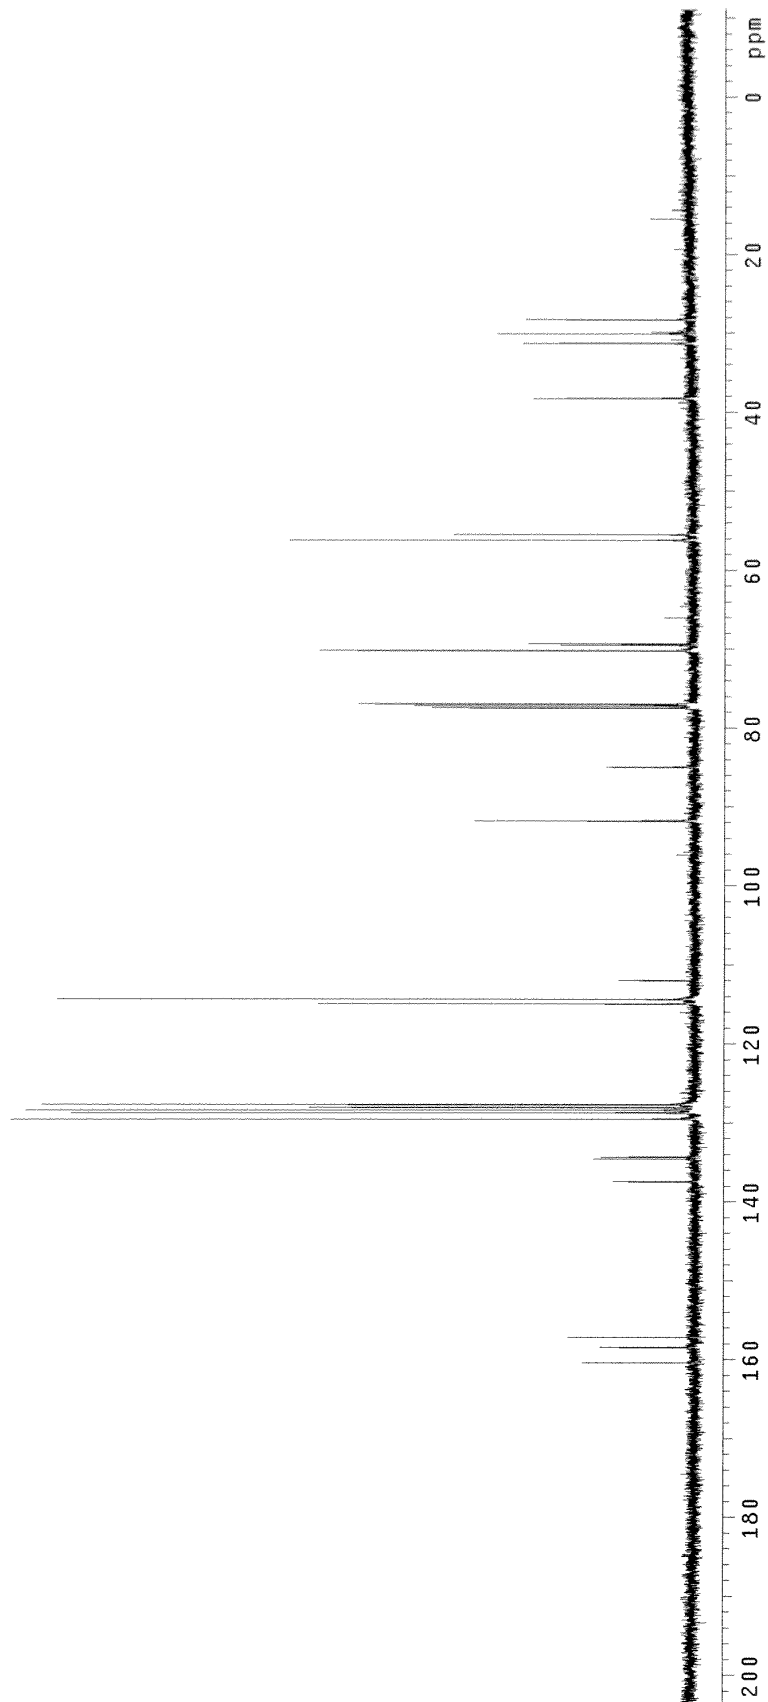

STANDARD PROTON PARAMETERS

Pulse Sequence: s2pu1  
Solvent: CDCl3  
Ambient temperature  
INOVA-500 "nmr2a.chem.nd.edu"

Relax. delay 0.100 sec  
Pulse 90.0 degrees  
Acq time 5.016 sec  
Width 6533.3 Hz  
8 repetitions  
OBSERVE F1, 499.8611711 MHz  
DATA PROCESSING  
F1 size 65536  
Total time 0 min, 40 sec

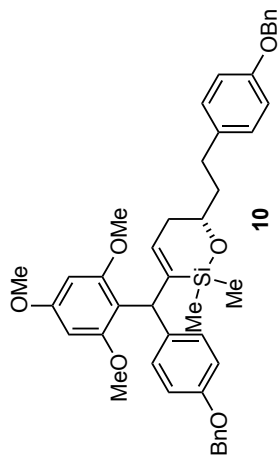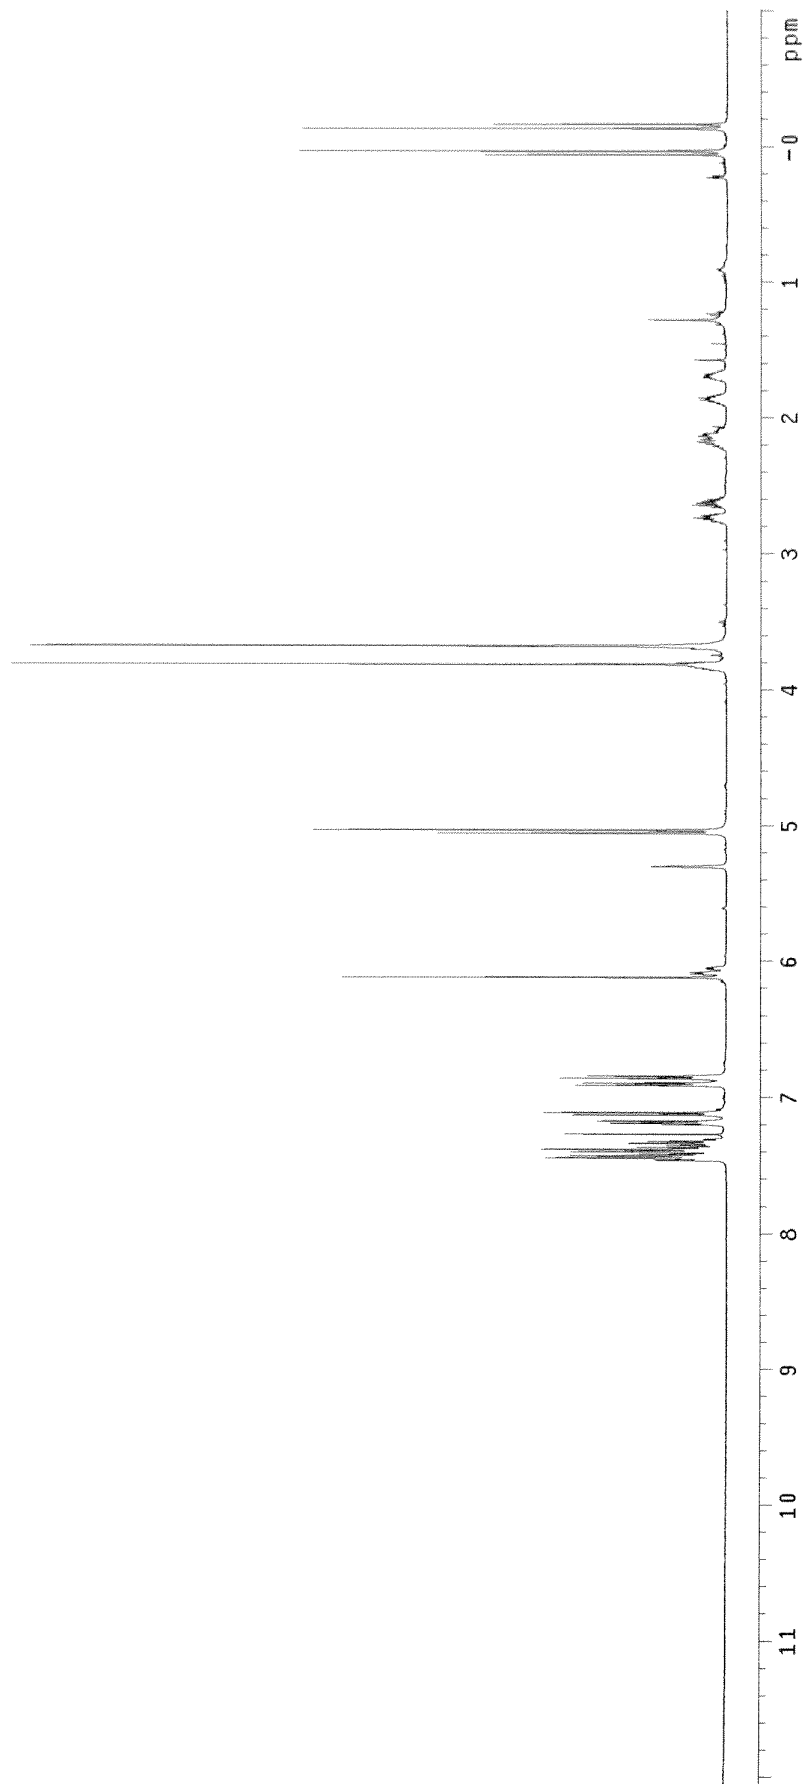

STANDARD PROTON PARAMETERS

Pulse Sequence: szpul  
Solvent: CDCl3  
Ambient temperature  
USR: 1-14-87  
INOVA-500 "nmr2a.chem.nd.edu"

Relax. delay 1.800 sec  
Pulse 90.0 degrees  
Acq. time 1.215 sec  
Width 26963.3 Hz  
800 repetitions  
OBSERVE C13, 125.6901673 MHZ  
DECOUPLE H1, 499.8636613 MHZ  
Power 40 dB  
continuously on  
WALTZ-16 modulated  
DATA PROCESSING  
Line broadening 1.0 Hz  
FT size 131072  
Total time 40 min, 19 sec

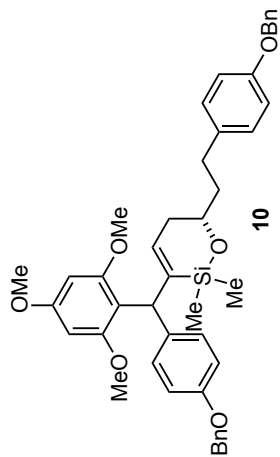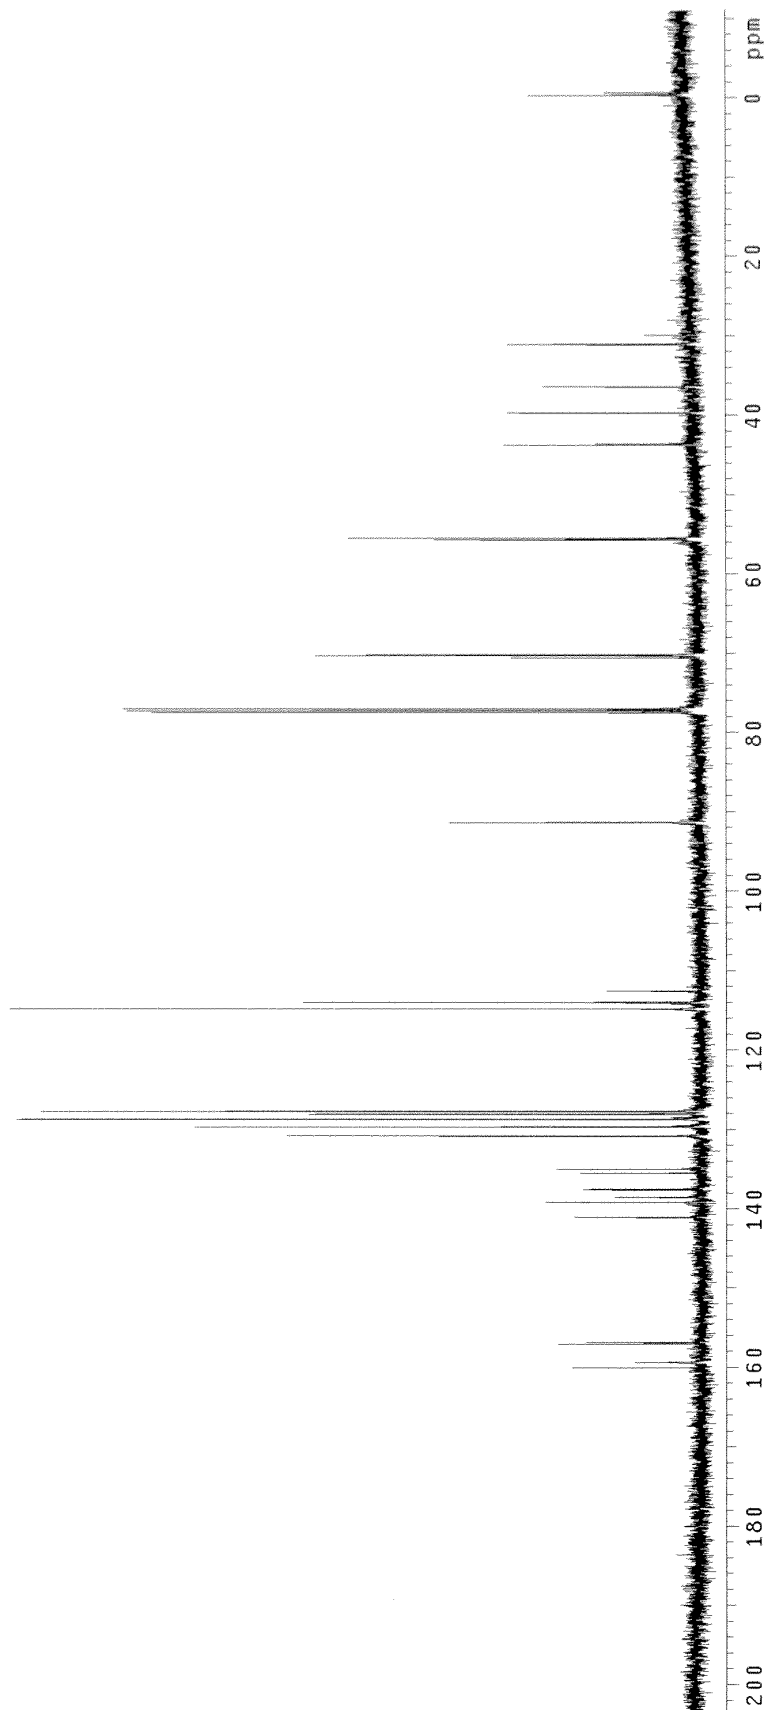

STANDARD PROTON PARAMETERS

Pulse Sequence: s2pu1  
Solvent: CDCl3  
Ambient temperature  
INOVA-500 "nmr2a.chem.nd.edu"

Relax. delay 0.100 sec  
Pulse 90.0 degrees  
Acq. time 5.016 sec  
Width 6533.3 Hz  
16 repetitions  
OBSERVE H1 499.8611768 MHZ  
DATA PROCESSING  
FT size 65536  
Total time 1 min, 21 sec

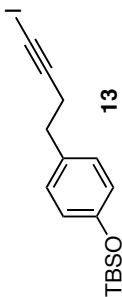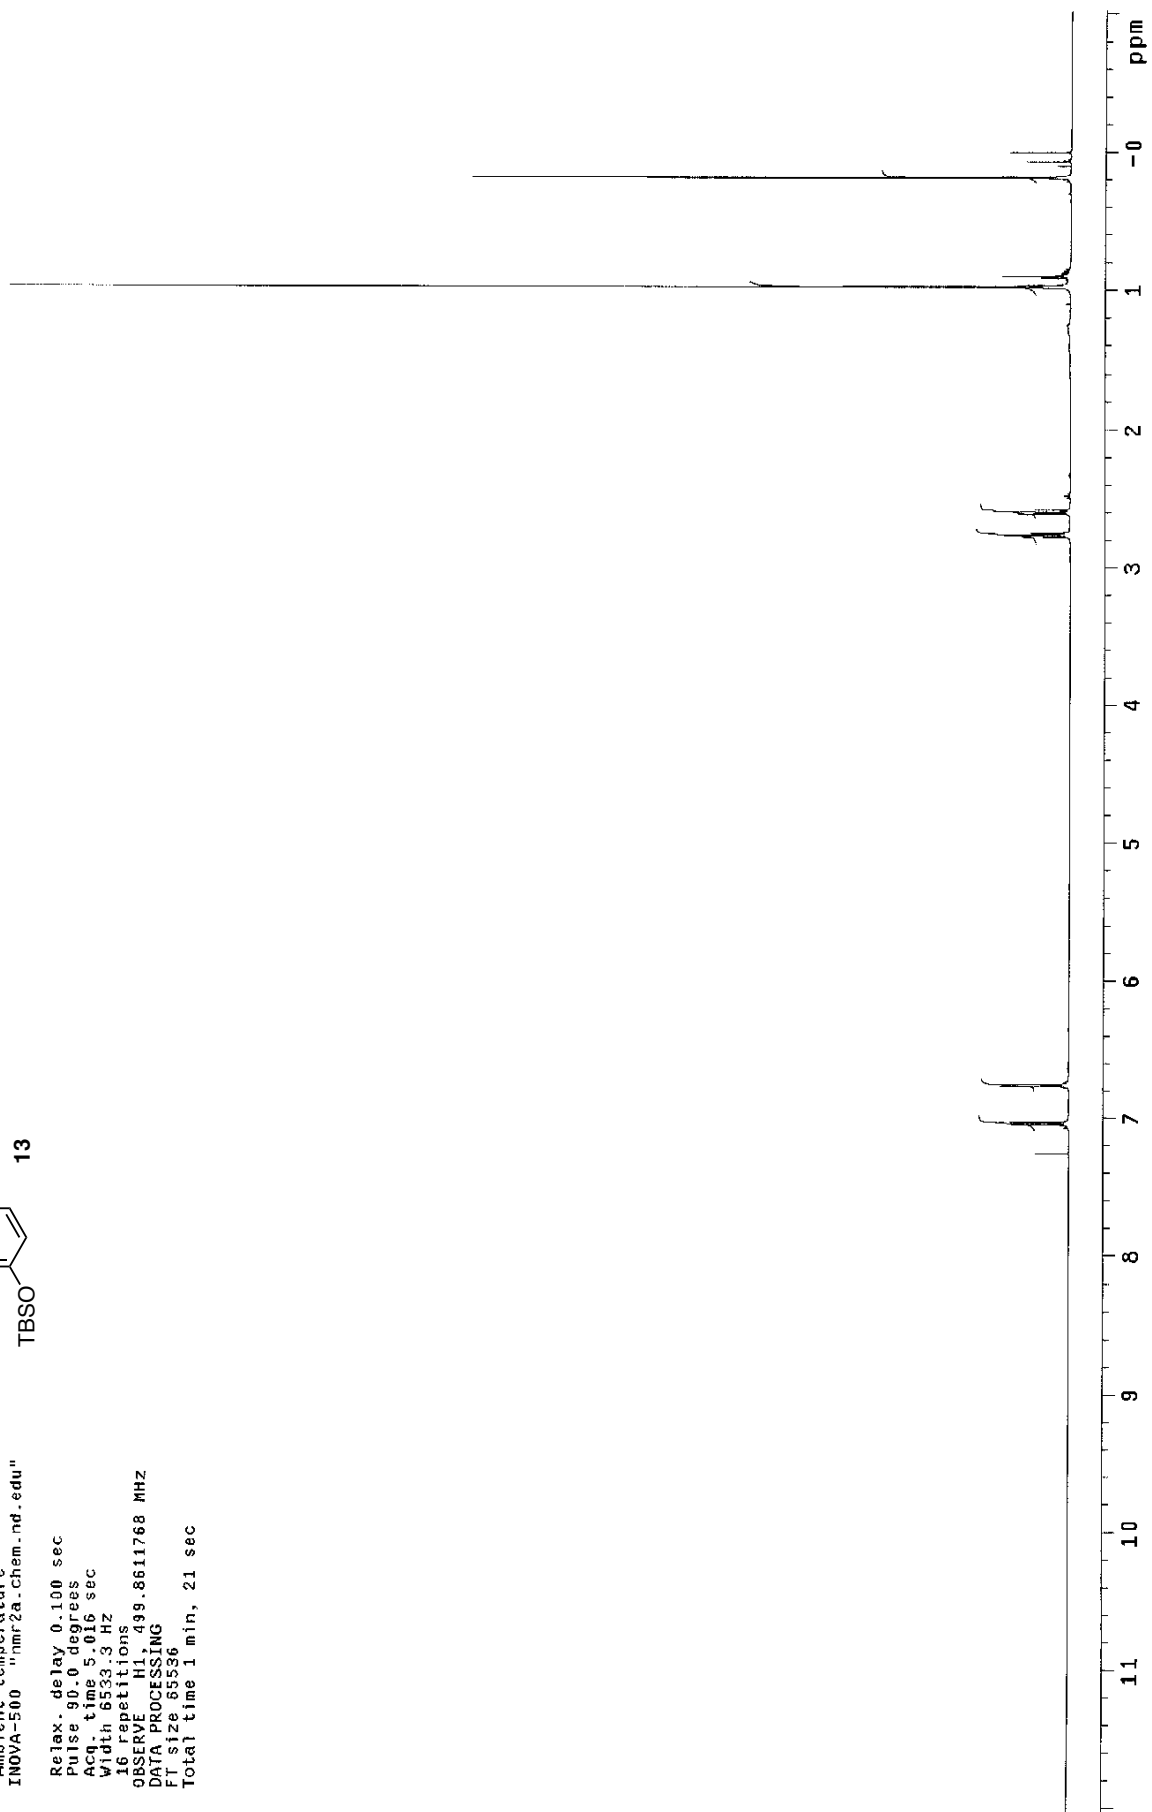

STANDARD PROTON PARAMETERS

Pulse Sequence: s2pu1  
Solvent: CDCl3  
Ambient temperature  
User: j1-1-87  
INOVA-500 "nmr2a.chem.nd.edu"

Relax. delay 1.800 sec  
Pulse 90.0 degrees  
Acq. time 1.215 sec  
Width 26963.3 Hz  
256 repetitions  
OBSERVE C13, 125.6901644 MHz  
DECOUPLE H1, 499.8636613 MHz  
Power 40 dB  
continuously on  
WALTZ-16 modulated  
DATA PROCESSING  
Line broadening 1.0 Hz  
FT size 131072  
Total time 12 min, 54 sec

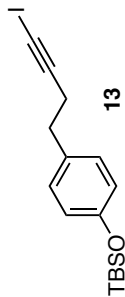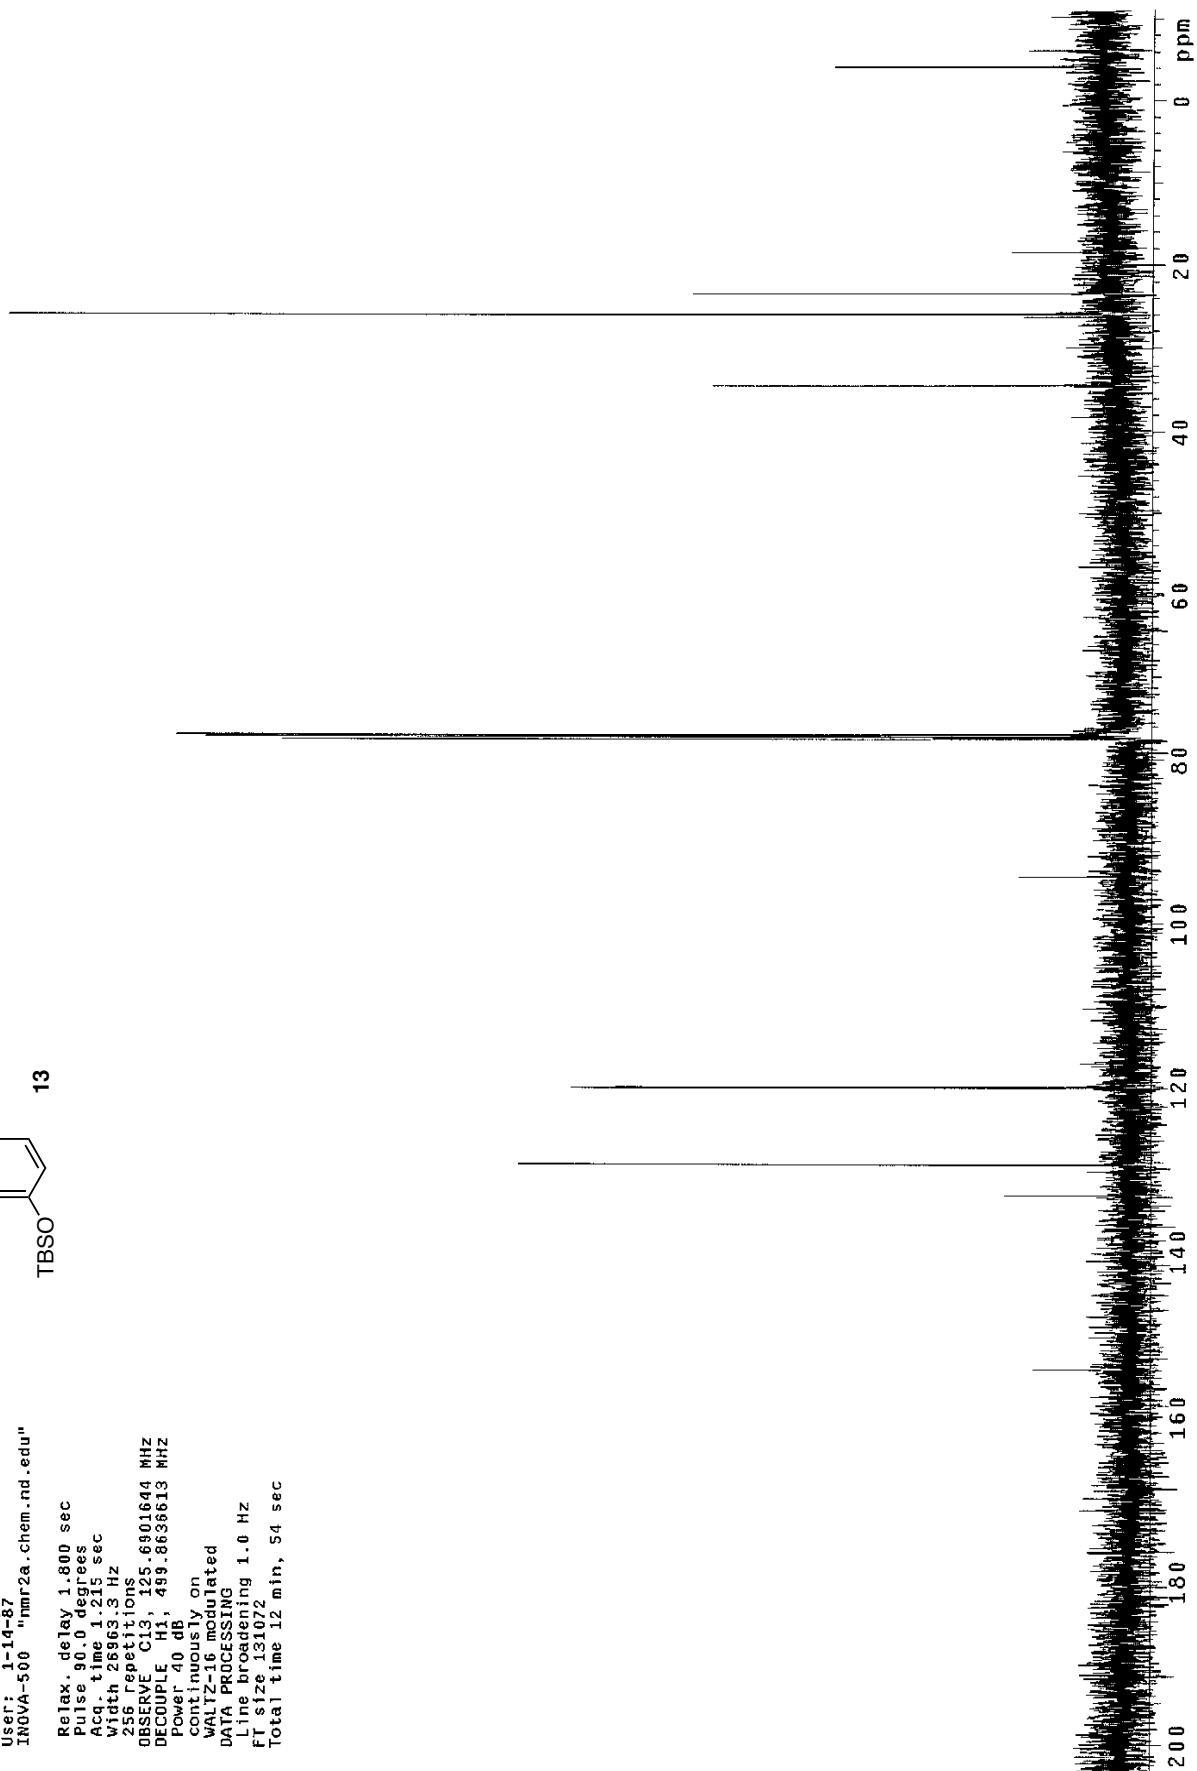

STANDARD PROTON PARAMETERS

Pulse Sequence: s2pu1  
Solvent: CDCl3  
Ambient temperature  
File: CAC6-78-1-10-13  
INOVA-500 "nmf2a.chem.nd.edu"  
Relax. delay 0.100 sec  
Pulse 90.0 degrees  
Acq. time 5.016 sec  
Width 6533.3 Hz  
16 repetitions  
OBSERVE H1, 459.8611764 MHz  
DATA PROCESSING  
FT size 65536  
Total time 1 min, 21 sec

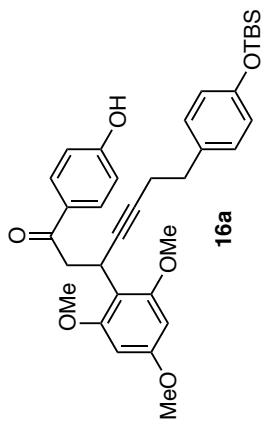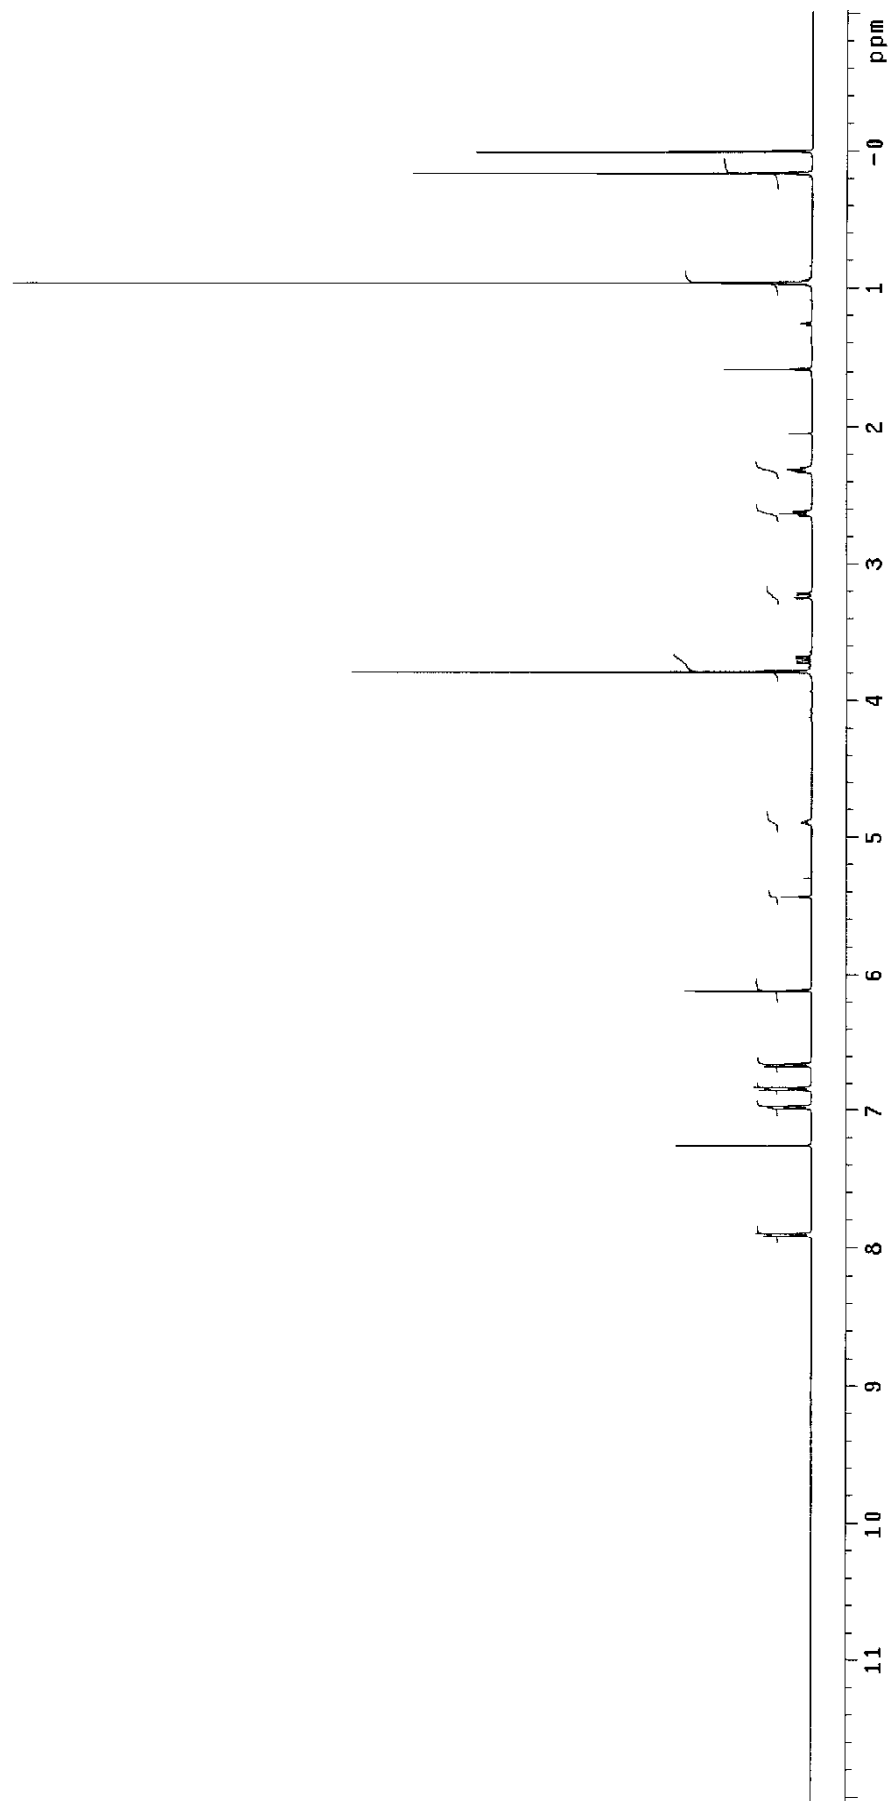

STANDARD PROTON PARAMETERS

Pulse Sequence: s2pu1  
Solvent: CDCl3  
Ambient temperature  
User: 1-14-87  
INOVA-500 "nmr2a.chem.nd.edu"

Relax. delay 1.800 sec  
Pulse 90.0 degrees  
Acq. 1.215 sec  
Width 26963.8 Hz  
256 repetitions  
OBSERVE C13, 125.6901673 MHZ  
DECUPLE H1, 499.8636613 MHZ  
Power 40 dB  
continuously on  
WALTZ-16 modulated  
DATA PROCESSING  
Line broadening 1.0 Hz  
FT size 131072  
Total time 12 min, 54 sec

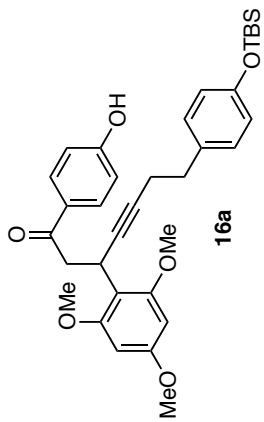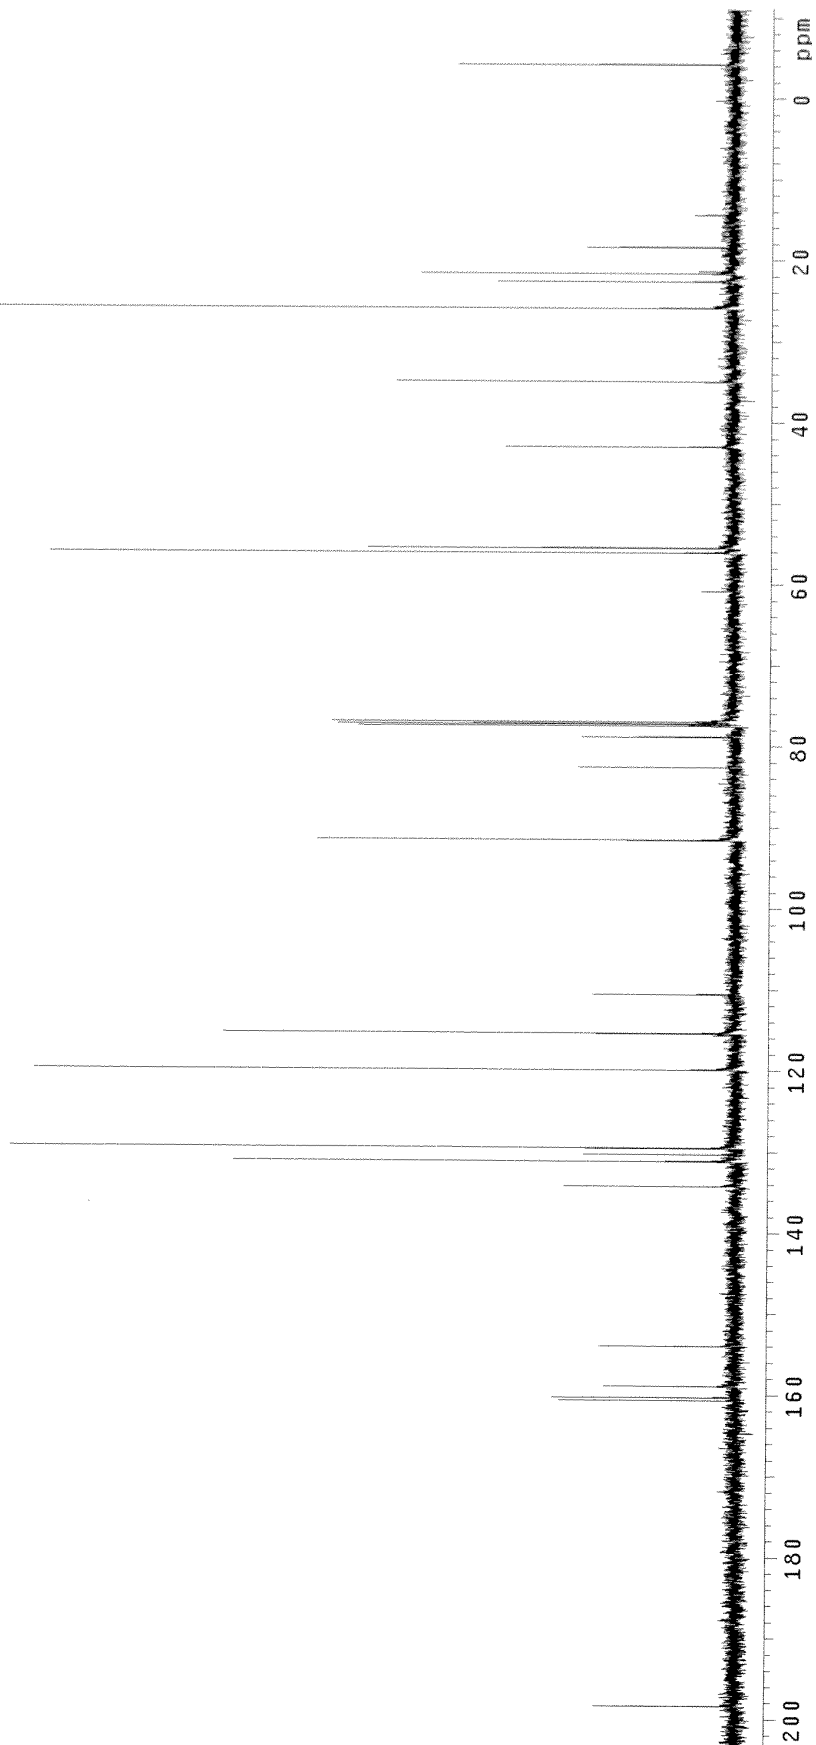





STANDARD PROTON PARAMETERS

Pulse Sequence: s2pu1  
Solvent: CDCl3  
Ambient temperature  
User: 1-14-87  
INDVA-500 "nmr2a.chem.nd.edu"

Relax. delay 1.800 sec  
Pulse 90.0 degrees  
Acq. time 1.215 sec  
Width 28963.3 Hz  
256 repetitions  
OBSERVE C13, 125.6901702 MHZ  
DECOUPLE H1, 499.8636613 MHZ  
Power 40 dB,  
continuously on  
WALTZ16 modulated  
DATA PROCESSING  
Line broadening 1.0 Hz  
F1 size 131072  
Total time 12 min, 54 sec

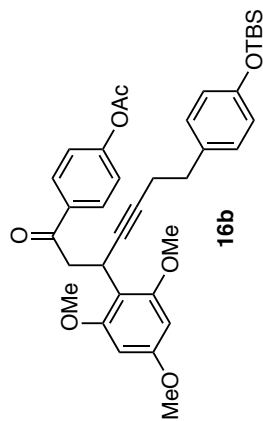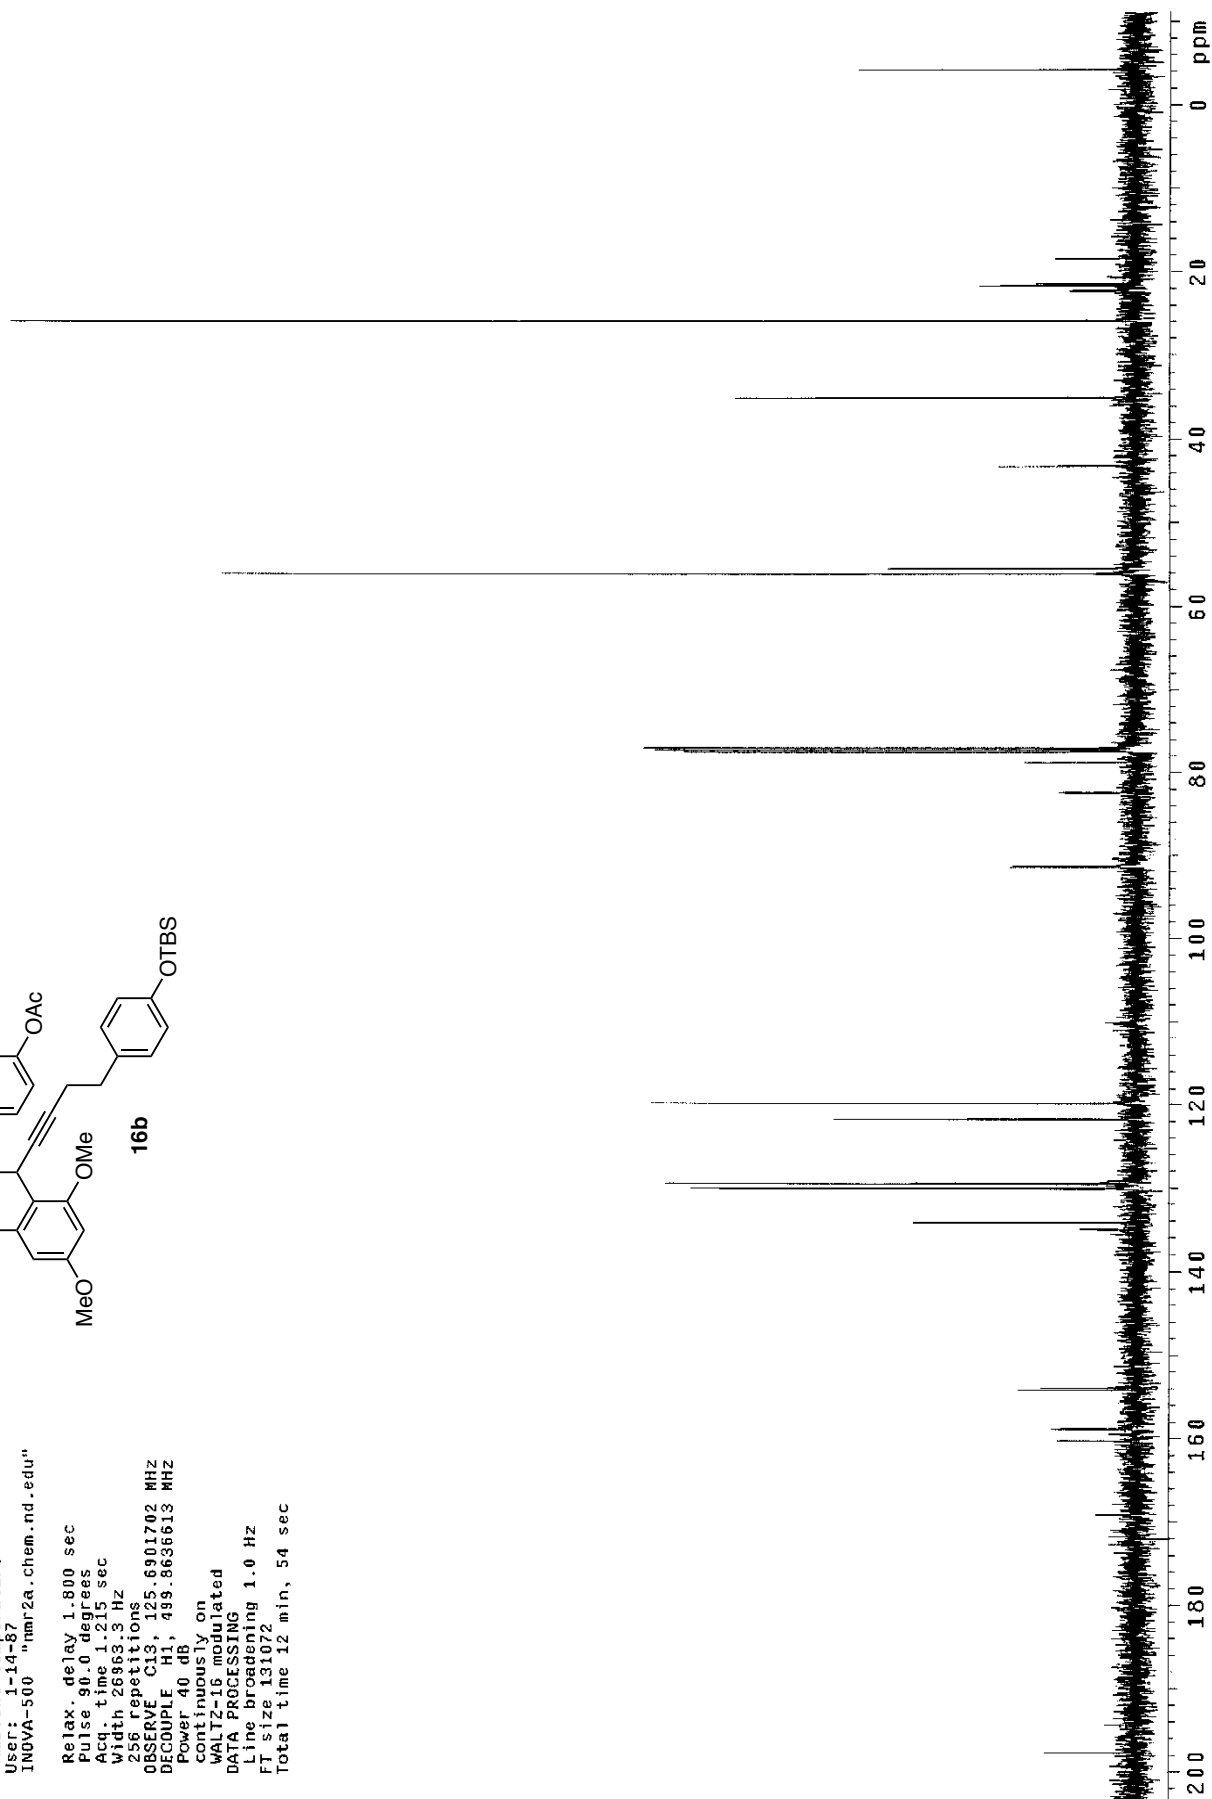

STANDARD PROTON PARAMETERS

Pulse Sequence: s2pul  
Solvent: CDCl3  
Ambient temperature  
INOVA-500 "nmr2a.chem.nd.edu"  
Relax. delay 0.100 sec  
Pulse 90.0 degrees  
Acq. time 5.016 sec  
Width 6533.3 Hz  
16 repetitions  
OBSERVE H1, 499.8611792 MHz  
DATA PROCESSING  
FT size 65536  
Total time 1 min, 21 sec

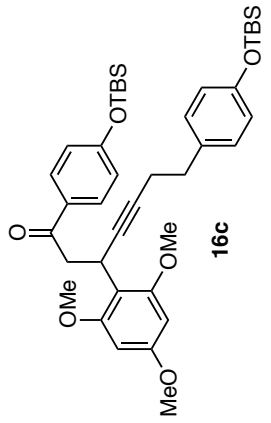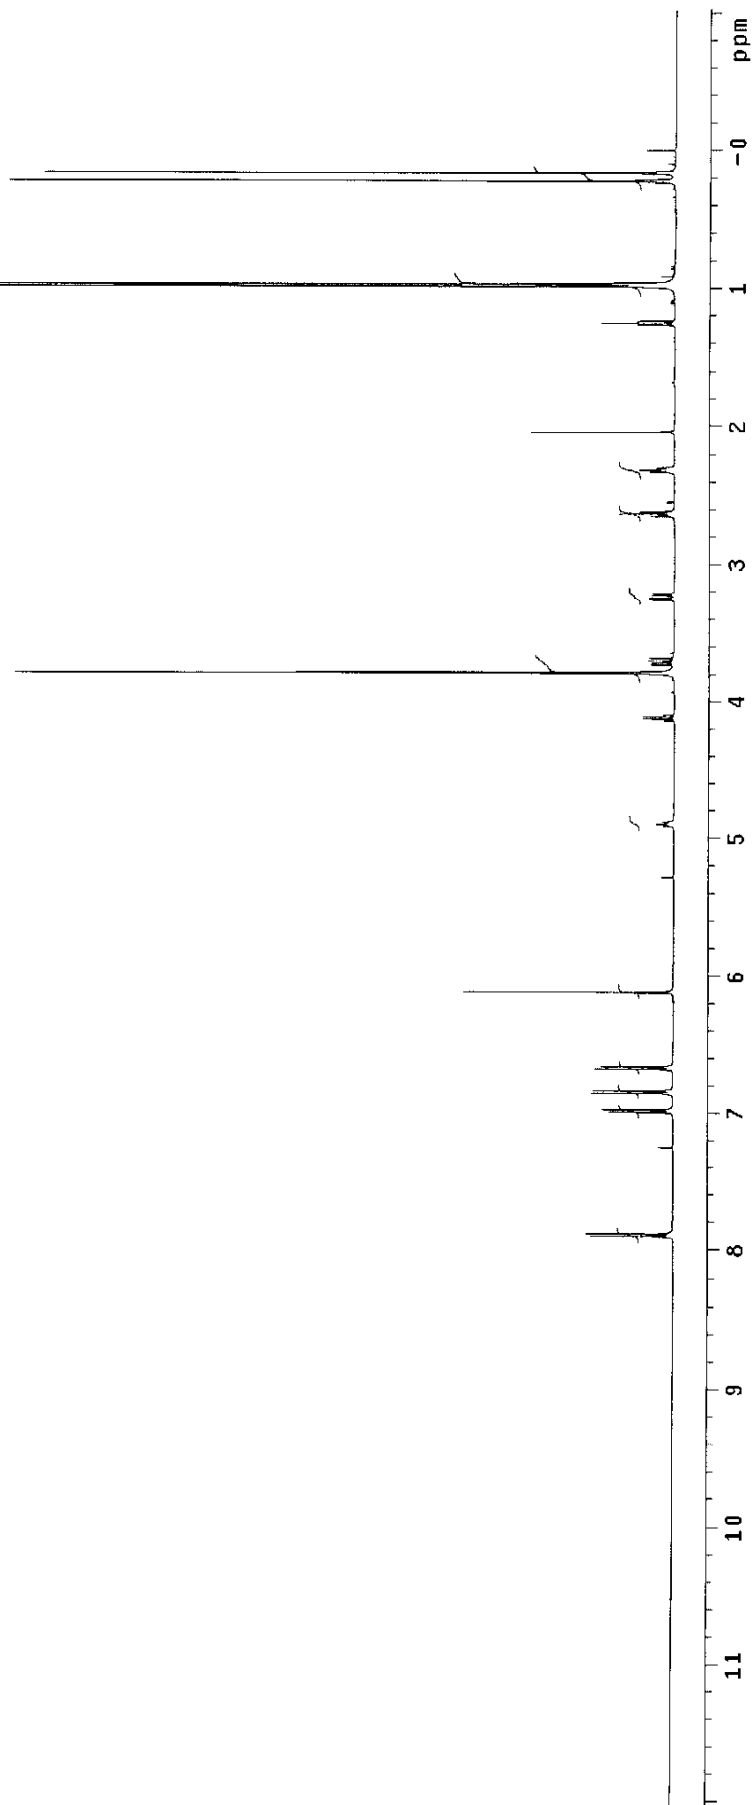

STANDARD PROTON PARAMETERS

Pulse Sequence: s2pu1  
Solvent: CDCl3  
Ambient temperature  
User: 1-14-87  
INOVA-500 "nmr2a.chem.nd.edu"

Relax. delay 1.800 sec  
Pulse 90.0 degrees  
Acq. time 1.215 sec  
Width 26963.3 Hz  
128 Repetitions  
OBSERVE C13, 125.6901702 MHz  
DECOUPLE H1, 499.8636613 MHz  
Power 40 dB  
continuously on  
WALTZ-16 modulated  
DATA PROCESSING  
Line broadening 1.0 Hz  
FT size 131072  
Total time 6 min, 27 sec

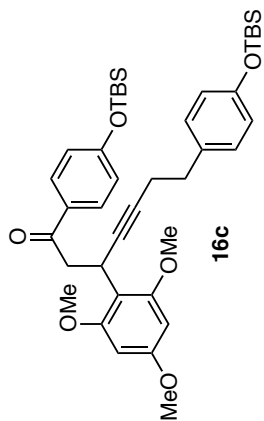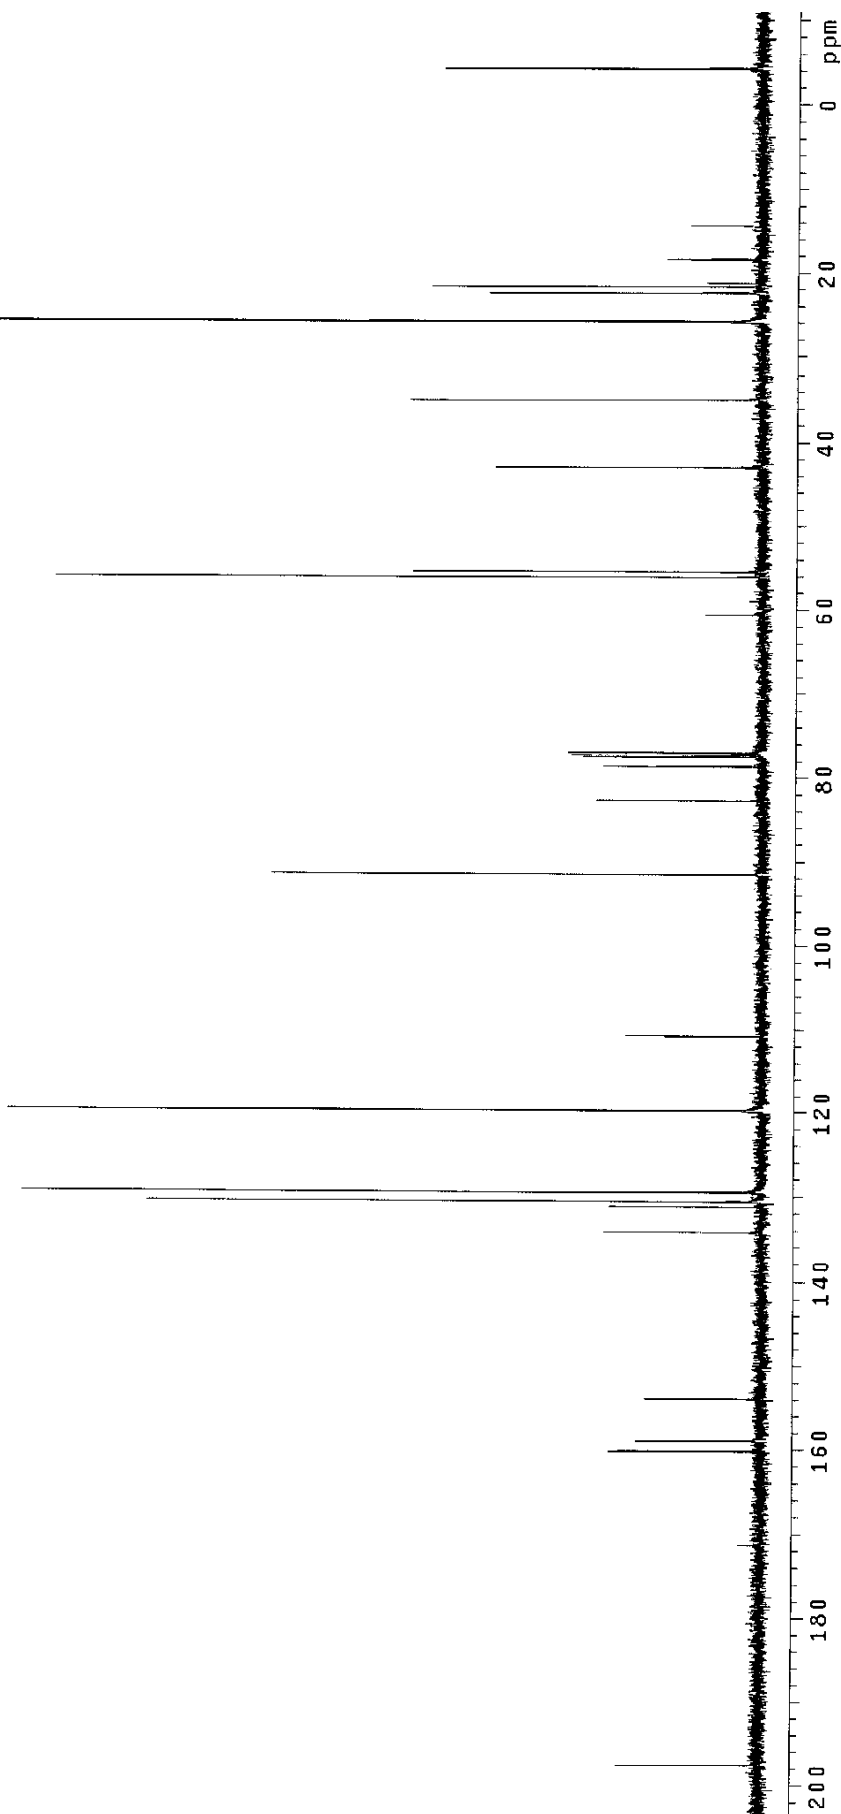



STANDARD PROTON PARAMETERS

Pulse Sequence: s2pul  
Solvent: CDCl3  
Ambient temperature  
User: 1-14-87  
INOVA-500 "nmr2a.Chem.nd.edu"  
Relax. delay 1.800 sec  
Pulse, 90.0 degrees  
Acq. time 1.215 sec  
Width 26863.3 Hz  
512 Repetitions  
OBSERVE C13, 125.6901652 MHZ  
DECUPLE H1, 499.8636613 MHZ  
Power 40 dB,  
continuously on  
WALTZ-16 modulated  
DATA PROCESSING  
Line broadening 1.0 Hz  
FT size 131072  
Total time 25 min, 48 sec

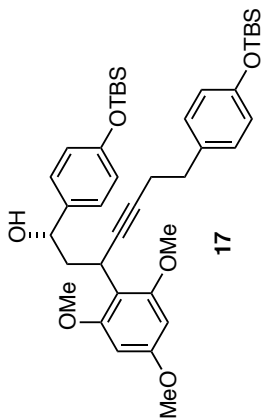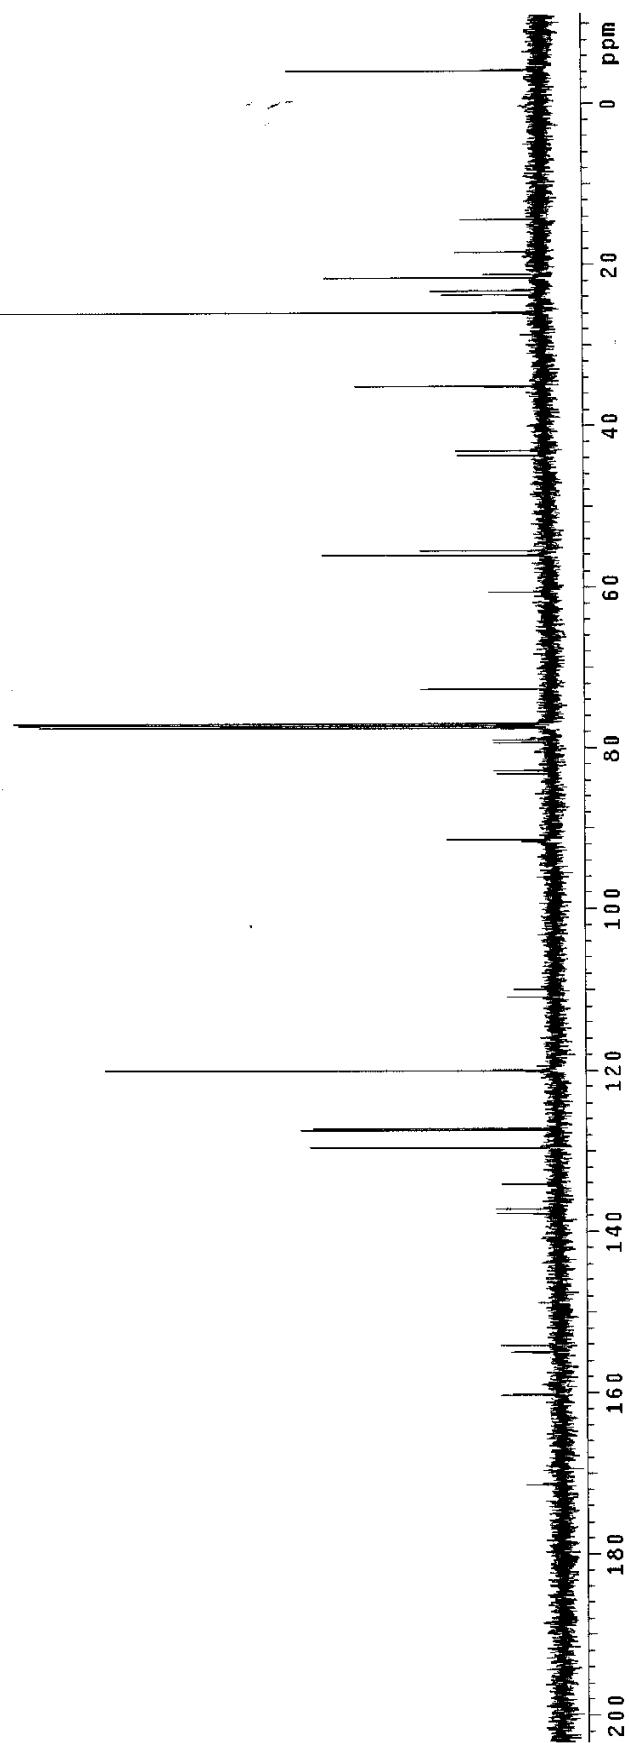

## 5. REFERENCES

- (1) Armarego, W. L. F.; Perrin, D. D. *Purification of Laboratory Chemicals*; 4th ed.; Butterworth-Heinemann: Oxford, 1996.
- (2) Chinnababu, B.; Reddy, S. P.; Rao, C. B.; Rajesh, K.; Venkateswarlu, Y. *Helv. Chim. Acta* **2010**, *93*, 1960.
- (3) Rauniyar, V.; Hall, D. G. *J. Org. Chem.* **2009**, *74*, 4236.
- (4) (a) Chen, H.-B.; Yin, J.; Wang, Y.; Pei, J. *Org. Lett.* **2008**, *10*, 3113. (b) Corey, E. J.; Fuchs, P. L. *Tetrahedron Lett.* **1972**, *13*, 3769.
- (5) Saitoh, T.; Oyama, T.; Sakurai, K.; Niimura, Y.; Hinata, M.; Horiguchi, Y.; Toda, J.; Sano, T. *Chem. Pharm. Bull.* **1996**, *44*, 956.
- (6) Helal, C. J.; Magriotis, P. A.; Corey, E. J. *J. Am. Chem. Soc.* **1996**, *118*, 10938.
- (7) (a) Kanth, J. V. B.; Periasamy, M. *Tetrahedron* **1993**, *49*, 5127. (b) Corey, E. J.; Bakshi, R. K. *Tetrahedron Lett.* **1990**, *31*, 611.
- (8) Leurs, C.; Jansen, M.; Pollok, K. E.; Heinkelein, M.; Schmidt, M.; Wissler, M.; Lindemann, D.; Kalle, C. v.; Rethwilm, A.; Williams, D. A.; Hanenberg, H. *Hum. Gene Ther.* **2003**, *14*, 509.
- (9) Oliver, M. H.; Harrison, N. K.; Bishop, J. E.; Cole, P. J.; Laurent, G. J. *J. Cell. Sci.* **1989**, *92*, 513.
- (10) Cai, S.; Wang, H.; Baluyut, A. R.; Ernstberger, A.; Juliar, B.; Sinn, A. L.; Mayo, L. D.; Goebel, W. S.; Pollok, K. E. *Clin. Cancer Res.* **2011**, *8*, 2195.
